# Supplementary material for: Excitation localization/delocalization induced intramolecular singlet fission in cyclopentadithiophene-based quinoidal derivatives
Source: Royal Society of Chemistry journal article supplement (doi:10.1039/d3cp02588h), 2023-01-01
Supplement: d3cp02588h1.pdf [file d3cp02588h1.pdf]

**Supporting information:**

**Excitation Localization/Delocalization Induced  
Intramolecular Singlet Fission in  
Cyclopentadithiophene-Based Quinoidal  
Derivatives**

Jin Wen,<sup>\*,†</sup> Jie Zhou,<sup>‡</sup> Xuesi Li,<sup>†</sup> Meng Lv,<sup>‡</sup> Jun Huang,<sup>¶</sup> Zheng Li,<sup>§</sup> Boyuan  
Zhang,<sup>†</sup> Ming Wang,<sup>§</sup> Jinquan Chen,<sup>‡</sup> and Meifang Zhu<sup>†</sup>

<sup>†</sup>*State Key Laboratory for Modification of Chemical Fibers and Polymer Materials, College  
of Materials Science and Engineering, Donghua University, Shanghai 201620, China*

<sup>‡</sup>*State Key Laboratory of Precision Spectroscopy, East China Normal University, Shanghai  
200241, China*

<sup>¶</sup>*Jiangsu Sidike New Materials Science and Technology Co., Ltd., Sihong Economic  
Development Area, Jiangsu 223900, China*

<sup>§</sup>*State Key Laboratory for Modification of Chemical Fibers and Polymer Materials, Center  
for Advanced Low-dimension Materials, Donghua University, Shanghai 201620, China*

E-mail: jinwen@dhu.edu.cn

# Contents

|                                                                   |     |
|-------------------------------------------------------------------|-----|
| Synthesis process of QP2 and QT2                                  | S3  |
| Quantum yield of QP1 in DCM                                       | S4  |
| Excitation energies from TD-DFT and multireference calculations.  | S5  |
| Electronic structure and computational potential energy surfaces  | S12 |
| Ultrafast spectra measured in solution and thin film              | S24 |
| Optimized structures of QT1                                       | S28 |
| Optimized coordinates in low-lying excited states of QPs and QTs. | S29 |

## Synthesis process of QP2 and QT2

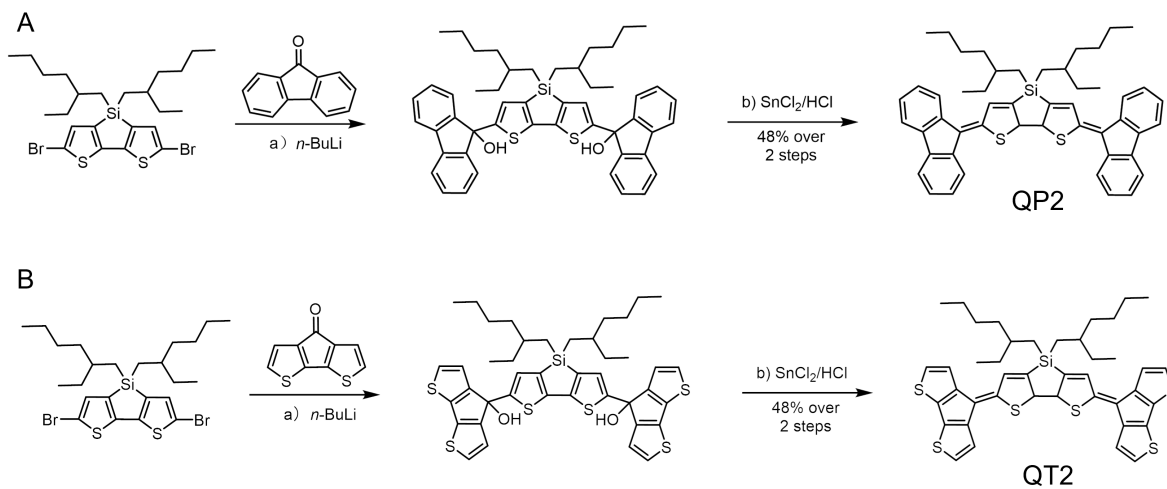

**Figure S1:** Synthesis process of QP2 (a) and QT2 (b).

**QP2:** <sup>1</sup>H NMR (chloroform-*d*, 600 MHz,  $\delta$ /ppm): 8.13 (d,  $J = 7.7$ , 2H), 8.02-7.94 (m, 4H), 7.81-7.79 (m, 4H), 7.46-7.29 (m, 8H), 1.69-1.61 (m, 2H), 1.49-1.08 (m, 20H), 0.95-79 (m, 12H).

<sup>13</sup>C NMR (chloroform-*d*, 150 MHz,  $\delta$ /ppm): 154.62, 149.60, 148.45, 139.70, 139.36, 137.81, 131.88, 127.20, 127.06, 124.35, 123.42, 120.14, 119.97, 36.05, 36.00, 29.20, 29.03, 23.27, 18.41, 14.35, 10.94.

**QT2:** <sup>1</sup>H NMR (chloroform-*d*, 400 MHz,  $\delta$ /ppm): 7.42 (s, 2H), 7.33-7.32 (d,  $J = 4$ , 2H), 7.25-7.24 (m, 2H), 7.12-7.11 (d,  $J = 4$ , 2H), 7.09-7.07 (d,  $J = 4$ , 2H), 1.39-1.22 (m, 16H), 1.11-1.08 (m, 4H), 0.88-0.84 (m, 14H).

<sup>13</sup>C NMR (chloroform-*d*, 100 MHz,  $\delta$ /ppm): 155.63, 155.60, 155.58, 149.11, 148.64, 143.44, 142.31, 136.95, 136.07, 131.42, 124.10, 124.05, 124.03, 124.01, 121.98, 121.20, 121.18, 121.15, 120.78, 35.70, 35.62, 28.81, 28.70, 22.91, 18.03, 14.01, 10.63.

# Quantum yield of QP1 in DCM

We determined the quantum yield of the triplet state in QP1 in a DCM solution by comparing the differences between the measured femtosecond transient absorption (fs-TA) and triplet-sensitized spectroscopy. The transient absorption spectrum value ( $A$ ) of the sample at a specific time is equal to the product of the extinction coefficient ( $\varepsilon$ ) of the sample at that time, the concentration ( $c$ ) of the sample at that time, and the optical path ( $l$ ) of the sample.

$$A = \varepsilon cl \quad (1)$$

Hence, we can calculate the concentration when we have information about the extinction coefficient, transient absorption spectrum value, and the sample's optical path using the following equation.

$$c = A/\varepsilon l \quad (2)$$

We denote the concentrations of the triplet and singlet states of QP1 in DCM as  $c(^3\text{QP1}^*)$  and  $c(^1\text{QP1}^*)$  respectively. They can be calculated as follows.

$$c(^3\text{QP1}^*) = \frac{\Delta A(^3\text{QP1}^*)}{\varepsilon(^3\text{QP1}^*)l} \quad (3)$$

$$c(^1\text{QP1}^*) = \frac{\Delta A(^1\text{QP1}^*)}{\varepsilon(^1\text{QP1}^*)l} \quad (4)$$

Throughout the experimental process, we assume that the extinction coefficient at the ground-state bleaching site remains constant, representing the extinction coefficient of steady-state particles. This value remains consistent for both the singlet and triplet states,  $\varepsilon(^3\text{QP1}^*) = \varepsilon(^1\text{QP1}^*)$ , and the optical path remains unchanged. The quantum yield of the triplet state can be calculated by dividing the spectral value of the triplet state by that of the singlet state.

$$\text{Yield}(^3\text{QP1}^*) = \frac{c(^3\text{QP1}^*)}{c(^1\text{QP1}^*)} = \frac{\Delta A(^3\text{QP1}^*)/\varepsilon(^3\text{QP1}^*)l}{\Delta A(^1\text{QP1}^*)/\varepsilon(^1\text{QP1}^*)l} = \frac{\Delta A(^3\text{QP1}^*)}{\Delta A(^1\text{QP1}^*)}. \quad (5)$$



# Excitation energies from TD-DFT and multireference calculations.

**Table S1:** DRC index  $y_0$  of different compounds calculated at UHF/cc-pVDZ level.

|     | $y_0$ | T     | $n_{\text{HONO}}$ | $n_{\text{LUNO}}$ |
|-----|-------|-------|-------------------|-------------------|
| QP1 | 0.368 | 0.356 | 1.356             | 0.644             |
| QP2 | 0.395 | 0.337 | 1.337             | 0.663             |
| QT1 | 0.301 | 0.408 | 1.408             | 0.592             |
| QT2 | 0.329 | 0.385 | 1.385             | 0.614             |

**Table S2:** Vertical excitation energies of QP1 calculated at the B3LYP/cc-pVDZ level.

| state           | E (eV) | E (nm)  | f      |
|-----------------|--------|---------|--------|
| S <sub>1</sub>  | 2.0553 | 603.23  | 1.9521 |
| S <sub>2</sub>  | 2.4766 | 500.63  | 0.0002 |
| S <sub>3</sub>  | 2.4767 | 500.61  | 0.0008 |
| S <sub>4</sub>  | 2.7375 | 452.91  | 0.0013 |
| S <sub>5</sub>  | 3.3332 | 371.97  | 0.0202 |
| S <sub>6</sub>  | 3.4411 | 360.30  | 0.0051 |
| S <sub>7</sub>  | 3.4593 | 358.41  | 0.0026 |
| S <sub>8</sub>  | 3.4757 | 356.72  | 0.0306 |
| S <sub>9</sub>  | 3.5175 | 352.48  | 0.0123 |
| S <sub>10</sub> | 3.6868 | 336.29  | 0.0012 |
| S <sub>11</sub> | 3.8040 | 325.93  | 0.0021 |
| S <sub>12</sub> | 3.8999 | 317.92  | 0.0526 |
| S <sub>13</sub> | 3.9335 | 315.20  | 0.0106 |
| S <sub>14</sub> | 3.9351 | 315.07  | 0.0099 |
| S <sub>15</sub> | 4.1766 | 296.85  | 0.0270 |
| S <sub>16</sub> | 4.1857 | 296.21  | 0.0182 |
| S <sub>17</sub> | 4.3089 | 287.74  | 0.0044 |
| S <sub>18</sub> | 4.3119 | 287.54  | 0.0001 |
| S <sub>19</sub> | 4.3144 | 287.37  | 0.0022 |
| S <sub>20</sub> | 4.3363 | 285.92  | 0.0006 |
| S <sub>21</sub> | 4.6011 | 269.46  | 0.0399 |
| S <sub>22</sub> | 4.6134 | 268.75  | 0.0087 |
| S <sub>23</sub> | 4.6724 | 265.36  | 0.2846 |
| S <sub>24</sub> | 4.6737 | 265.28  | 0.0248 |
| S <sub>25</sub> | 4.7564 | 260.67  | 0.0038 |
| T <sub>1</sub>  | 0.6845 | 1811.22 | 0      |
| T <sub>2</sub>  | 2.0173 | 614.59  | 0      |
| T <sub>3</sub>  | 2.2473 | 551.69  | 0      |
| T <sub>4</sub>  | 2.2475 | 551.66  | 0      |
| T <sub>5</sub>  | 2.6118 | 474.70  | 0      |
| T <sub>6</sub>  | 3.0950 | 400.59  | 0      |
| T <sub>7</sub>  | 3.1035 | 399.50  | 0      |
| T <sub>8</sub>  | 3.1319 | 395.88  | 0      |
| T <sub>9</sub>  | 3.2060 | 386.72  | 0      |
| T <sub>10</sub> | 3.2421 | 382.41  | 0      |
| T <sub>11</sub> | 3.2838 | 377.57  | 0      |
| T <sub>12</sub> | 3.2970 | 376.05  | 0      |
| T <sub>13</sub> | 3.4093 | 363.66  | 0      |
| T <sub>14</sub> | 3.4295 | 361.53  | 0      |
| T <sub>15</sub> | 3.7044 | 334.70  | 0      |
| T <sub>16</sub> | 3.8331 | 323.46  | 0      |
| T <sub>17</sub> | 3.8522 | 321.85  | 0      |
| T <sub>18</sub> | 3.8526 | 321.82  | 0      |
| T <sub>19</sub> | 3.9428 | 314.46  | 0      |
| T <sub>20</sub> | 3.9999 | 309.97  | 0      |
| T <sub>21</sub> | 4.0318 | 307.52  | 0      |
| T <sub>22</sub> | 4.0519 | 305.99  | 0      |
| T <sub>23</sub> | 4.0765 | 304.14  | 0      |
| T <sub>24</sub> | 4.0998 | 302.42  | 0      |
| T <sub>25</sub> | 4.3247 | 286.69  | 0      |

**Table S3:** Vertical excitation energies of QP2 calculated at the B3LYP/cc-pVDZ level.

| state           | E (eV) | E (nm)  | f      |
|-----------------|--------|---------|--------|
| S <sub>1</sub>  | 1.9870 | 623.96  | 1.8098 |
| S <sub>2</sub>  | 2.4339 | 509.41  | 0.0001 |
| S <sub>3</sub>  | 2.4343 | 509.32  | 0.0012 |
| S <sub>4</sub>  | 2.5946 | 477.85  | 0.0001 |
| S <sub>5</sub>  | 3.1985 | 387.63  | 0.0661 |
| S <sub>6</sub>  | 3.4129 | 363.28  | 0.0050 |
| S <sub>7</sub>  | 3.4218 | 362.34  | 0.0343 |
| S <sub>8</sub>  | 3.4399 | 360.43  | 0.0014 |
| S <sub>9</sub>  | 3.4494 | 359.44  | 0.0153 |
| S <sub>10</sub> | 3.6990 | 335.18  | 0.0006 |
| S <sub>11</sub> | 3.6997 | 335.12  | 0.0003 |
| S <sub>12</sub> | 3.7478 | 330.82  | 0.0016 |
| S <sub>13</sub> | 3.7509 | 330.55  | 0.0064 |
| S <sub>14</sub> | 3.8806 | 319.50  | 0.0509 |
| S <sub>15</sub> | 3.9787 | 311.62  | 0.0512 |
| S <sub>16</sub> | 4.0546 | 305.79  | 0.0121 |
| S <sub>17</sub> | 4.2364 | 292.66  | 0.0126 |
| S <sub>18</sub> | 4.2691 | 290.42  | 0.0000 |
| S <sub>19</sub> | 4.2738 | 290.10  | 0.0103 |
| S <sub>20</sub> | 4.3009 | 288.28  | 0.0004 |
| S <sub>21</sub> | 4.3043 | 288.05  | 0.0002 |
| S <sub>22</sub> | 4.5176 | 274.45  | 0.0727 |
| S <sub>23</sub> | 4.5869 | 270.30  | 0.0274 |
| S <sub>24</sub> | 4.5876 | 270.26  | 0.0917 |
| S <sub>25</sub> | 4.7476 | 261.15  | 0.0094 |
| T <sub>1</sub>  | 0.5884 | 2107.13 | 0      |
| T <sub>2</sub>  | 1.9027 | 651.62  | 0      |
| T <sub>3</sub>  | 2.2085 | 561.38  | 0      |
| T <sub>4</sub>  | 2.2088 | 561.31  | 0      |
| T <sub>5</sub>  | 2.4479 | 506.48  | 0      |
| T <sub>6</sub>  | 3.0630 | 404.78  | 0      |
| T <sub>7</sub>  | 3.0739 | 403.35  | 0      |
| T <sub>8</sub>  | 3.0890 | 401.37  | 0      |
| T <sub>9</sub>  | 3.1805 | 389.83  | 0      |
| T <sub>10</sub> | 3.1929 | 388.32  | 0      |
| T <sub>11</sub> | 3.2390 | 382.78  | 0      |
| T <sub>12</sub> | 3.2766 | 378.40  | 0      |
| T <sub>13</sub> | 3.3592 | 369.09  | 0      |
| T <sub>14</sub> | 3.3761 | 367.24  | 0      |
| T <sub>15</sub> | 3.5973 | 344.66  | 0      |
| T <sub>16</sub> | 3.7151 | 333.73  | 0      |
| T <sub>17</sub> | 3.7153 | 333.71  | 0      |
| T <sub>18</sub> | 3.7631 | 329.47  | 0      |
| T <sub>19</sub> | 3.7944 | 326.75  | 0      |
| T <sub>20</sub> | 3.9345 | 315.12  | 0      |
| T <sub>21</sub> | 3.9363 | 314.98  | 0      |
| T <sub>22</sub> | 4.0310 | 307.58  | 0      |
| T <sub>23</sub> | 4.0333 | 307.40  | 0      |
| T <sub>24</sub> | 4.0473 | 306.34  | 0      |
| T <sub>25</sub> | 4.2091 | 294.56  | 0      |

**Table S4:** Vertical excitation energies of QT1 calculated at the B3LYP/cc-pVDZ level.

| state           | E (eV) | E (nm)  | f      |
|-----------------|--------|---------|--------|
| S <sub>1</sub>  | 1.7942 | 691.01  | 0.0000 |
| S <sub>2</sub>  | 1.7945 | 690.90  | 0.0066 |
| S <sub>3</sub>  | 2.1333 | 581.19  | 2.0316 |
| S <sub>4</sub>  | 2.7490 | 451.01  | 0.0006 |
| S <sub>5</sub>  | 3.1926 | 388.35  | 0.0051 |
| S <sub>6</sub>  | 3.1927 | 388.33  | 0.0358 |
| S <sub>7</sub>  | 3.3918 | 365.54  | 0.0205 |
| S <sub>8</sub>  | 3.4824 | 356.03  | 0.0017 |
| S <sub>9</sub>  | 3.4945 | 354.80  | 0.0529 |
| S <sub>10</sub> | 3.6223 | 342.28  | 0.0001 |
| S <sub>11</sub> | 3.7325 | 332.17  | 0.0093 |
| S <sub>12</sub> | 3.8304 | 323.69  | 0.0010 |
| S <sub>13</sub> | 3.9241 | 315.96  | 0.0521 |
| S <sub>14</sub> | 4.0296 | 307.68  | 0.0006 |
| S <sub>15</sub> | 4.0657 | 304.95  | 0.0003 |
| S <sub>16</sub> | 4.1422 | 299.32  | 0.0000 |
| S <sub>17</sub> | 4.1470 | 298.97  | 0.0441 |
| S <sub>18</sub> | 4.1664 | 297.58  | 0.0161 |
| S <sub>19</sub> | 4.1701 | 297.32  | 0.2310 |
| S <sub>20</sub> | 4.4148 | 280.84  | 0.0371 |
| S <sub>21</sub> | 4.5614 | 271.81  | 0.0025 |
| S <sub>22</sub> | 4.5627 | 271.74  | 0.1977 |
| S <sub>23</sub> | 4.7453 | 261.28  | 0.0000 |
| S <sub>24</sub> | 4.7462 | 261.23  | 0.0001 |
| S <sub>25</sub> | 4.7853 | 259.09  | 0.0026 |
| T <sub>1</sub>  | 0.7392 | 1677.35 | 0      |
| T <sub>2</sub>  | 1.4920 | 831.00  | 0      |
| T <sub>3</sub>  | 1.4923 | 830.84  | 0      |
| T <sub>4</sub>  | 2.0518 | 604.26  | 0      |
| T <sub>5</sub>  | 2.6115 | 474.75  | 0      |
| T <sub>6</sub>  | 2.6605 | 466.02  | 0      |
| T <sub>7</sub>  | 2.6607 | 465.99  | 0      |
| T <sub>8</sub>  | 3.0718 | 403.62  | 0      |
| T <sub>9</sub>  | 3.1930 | 388.30  | 0      |
| T <sub>10</sub> | 3.2095 | 386.31  | 0      |
| T <sub>11</sub> | 3.3707 | 367.83  | 0      |
| T <sub>12</sub> | 3.4085 | 363.75  | 0      |
| T <sub>13</sub> | 3.4867 | 355.59  | 0      |
| T <sub>14</sub> | 3.4878 | 355.48  | 0      |
| T <sub>15</sub> | 3.5300 | 351.23  | 0      |
| T <sub>16</sub> | 3.6098 | 343.47  | 0      |
| T <sub>17</sub> | 3.6246 | 342.06  | 0      |
| T <sub>18</sub> | 3.7080 | 334.37  | 0      |
| T <sub>19</sub> | 3.7875 | 327.35  | 0      |
| T <sub>20</sub> | 3.9595 | 313.13  | 0      |
| T <sub>21</sub> | 4.0302 | 307.64  | 0      |
| T <sub>22</sub> | 4.0693 | 304.68  | 0      |
| T <sub>23</sub> | 4.2897 | 289.03  | 0      |
| T <sub>24</sub> | 4.2908 | 288.96  | 0      |
| T <sub>25</sub> | 4.3047 | 288.02  | 0      |

**Table S5:** Vertical excitation energies of QT2 calculated at the B3LYP/cc-pVDZ level.

| state           | E (eV) | E (nm)  | f      |
|-----------------|--------|---------|--------|
| S <sub>1</sub>  | 1.7469 | 709.72  | 0.0000 |
| S <sub>2</sub>  | 1.7470 | 709.69  | 0.0054 |
| S <sub>3</sub>  | 2.0640 | 600.71  | 1.8818 |
| S <sub>4</sub>  | 2.6074 | 475.51  | 0.0000 |
| S <sub>5</sub>  | 3.0170 | 410.95  | 0.0231 |
| S <sub>6</sub>  | 3.0171 | 410.94  | 0.0095 |
| S <sub>7</sub>  | 3.2702 | 379.14  | 0.0642 |
| S <sub>8</sub>  | 3.4399 | 360.43  | 0.0534 |
| S <sub>9</sub>  | 3.4463 | 359.76  | 0.0001 |
| S <sub>10</sub> | 3.5935 | 345.02  | 0.0000 |
| S <sub>11</sub> | 3.7119 | 334.02  | 0.0002 |
| S <sub>12</sub> | 3.7365 | 331.81  | 0.0038 |
| S <sub>13</sub> | 3.7946 | 326.74  | 0.0024 |
| S <sub>14</sub> | 3.9082 | 317.24  | 0.0538 |
| S <sub>15</sub> | 3.9890 | 310.82  | 0.0737 |
| S <sub>16</sub> | 3.9970 | 310.19  | 0.0054 |
| S <sub>17</sub> | 4.0042 | 309.64  | 0.0000 |
| S <sub>18</sub> | 4.1700 | 297.32  | 0.0332 |
| S <sub>19</sub> | 4.1757 | 296.92  | 0.2376 |
| S <sub>20</sub> | 4.3021 | 288.19  | 0.0299 |
| S <sub>21</sub> | 4.3539 | 284.77  | 0.1692 |
| S <sub>22</sub> | 4.3563 | 284.61  | 0.0015 |
| S <sub>23</sub> | 4.6161 | 268.59  | 0.0064 |
| S <sub>24</sub> | 4.6281 | 267.89  | 0.1054 |
| S <sub>25</sub> | 4.6613 | 265.98  | 0.0000 |
| T <sub>1</sub>  | 0.6446 | 1923.47 | 0      |
| T <sub>2</sub>  | 1.4525 | 853.61  | 0      |
| T <sub>3</sub>  | 1.4531 | 853.26  | 0      |
| T <sub>4</sub>  | 1.9258 | 643.81  | 0      |
| T <sub>5</sub>  | 2.4775 | 500.44  | 0      |
| T <sub>6</sub>  | 2.6171 | 473.74  | 0      |
| T <sub>7</sub>  | 2.6174 | 473.70  | 0      |
| T <sub>8</sub>  | 3.0379 | 408.13  | 0      |
| T <sub>9</sub>  | 3.1309 | 396.00  | 0      |
| T <sub>10</sub> | 3.1681 | 391.35  | 0      |
| T <sub>11</sub> | 3.2800 | 378.00  | 0      |
| T <sub>12</sub> | 3.3156 | 373.94  | 0      |
| T <sub>13</sub> | 3.3181 | 373.66  | 0      |
| T <sub>14</sub> | 3.3348 | 371.79  | 0      |
| T <sub>15</sub> | 3.4820 | 356.07  | 0      |
| T <sub>16</sub> | 3.5098 | 353.25  | 0      |
| T <sub>17</sub> | 3.5660 | 347.68  | 0      |
| T <sub>18</sub> | 3.5863 | 345.72  | 0      |
| T <sub>19</sub> | 3.7163 | 333.62  | 0      |
| T <sub>20</sub> | 3.8909 | 318.65  | 0      |
| T <sub>21</sub> | 3.9390 | 314.76  | 0      |
| T <sub>22</sub> | 4.0403 | 306.87  | 0      |
| T <sub>23</sub> | 4.2559 | 291.32  | 0      |
| T <sub>24</sub> | 4.2567 | 291.27  | 0      |
| T <sub>25</sub> | 4.2872 | 289.19  | 0      |

**Table S6:** Adiabatic excitation energies in low-lying excited states calculated at the TD-B3LYP/cc-pVDZ level in QP1 and QT1.

|     | $S_1^{\text{LE}}$ | $S_1^{\text{DE}}$ | $T_1$ | $T_2$ |
|-----|-------------------|-------------------|-------|-------|
| QP1 | 2.03              | 1.92              | 0.59  | 1.83  |
| QT1 | 1.31              | –                 | 0.71  | 1.02  |

**Table S7:** Vertical excitation energies (in eV) of low-lying excited states in QP1 and QT1 calculated at multireference levels.

|     | $S_1$                                      | $S_2$            | $S_3$            | $T_1$            | $T_2$            | $T_3$            |
|-----|--------------------------------------------|------------------|------------------|------------------|------------------|------------------|
| QP1 | 2.135 <sup>a</sup><br>(2.198) <sup>b</sup> | 3.144<br>(3.241) | 3.144<br>(3.241) | 1.292<br>(1.306) | 2.383<br>(2.416) | 2.944<br>(3.012) |
| QT1 | 2.183 <sup>a</sup><br>(2.336) <sup>b</sup> | 2.447<br>(2.499) | 2.448<br>(2.500) | 1.329<br>(1.500) | 2.162<br>(2.128) | 2.163<br>(2.128) |

<sup>a</sup> MS-CASPT2/cc-pVDZ (IPEA shift = 0.00 a.u.), <sup>b</sup> MC-PDFT/cc-pVDZ <sup>c</sup>

**Table S8:** Vertical excitation energies (in eV) calculated at the B3LYP/cc-pVDZ level of low-lying excited states with the oscillator strengths listed in the parentheses.

|     | $S_1$            | $S_2$            | $S_3$            | $T_1$        | $T_2$        | $T_3$        | $\Delta E_{\text{ST}}$ |
|-----|------------------|------------------|------------------|--------------|--------------|--------------|------------------------|
| QP1 | 2.055<br>(1.952) | 2.477<br>(0.000) | 2.477<br>(0.001) | 0.685<br>(0) | 2.017<br>(0) | 2.247<br>(0) | 1.370                  |
| QP2 | 1.987<br>(1.810) | 2.434<br>(0.000) | 2.434<br>(0.001) | 0.588<br>(0) | 1.903<br>(0) | 2.209<br>(0) | 1.399                  |
| QT1 | 1.794<br>(0.000) | 1.795<br>(0.007) | 2.133<br>(2.032) | 0.739<br>(0) | 1.492<br>(0) | 1.492<br>(0) | 1.055                  |
| QT2 | 1.747<br>(0.000) | 1.747<br>(0.005) | 2.064<br>(1.882) | 0.645<br>(0) | 1.453<br>(0) | 1.453<br>(0) | 1.102                  |

**Table S9:** Vertical excitation energies (in eV) of  $T_1$ - $T_n$  transitions calculated at the B3LYP/cc-pVDZ level in QTs and QPs.

|     | $T_2$ | $T_3$ | $T_4$ | $T_5$ | $T_6$ |
|-----|-------|-------|-------|-------|-------|
| QP1 | 1.542 | 1.643 | 1.643 | 2.247 | 2.380 |
| QP2 | 1.537 | 1.664 | 1.664 | 2.146 | 2.369 |
| QT1 | 0.810 | 0.810 | 1.532 | 1.906 | 1.906 |
| QT2 | 0.831 | 0.832 | 1.510 | 1.883 | 1.884 |

**Table S10:** The non-radiative decay rates constants (in  $s^{-1}$ ) and SOC (in  $cm^{-1}$ ) calculated at the B3LYP/cc-pVDZ level.

|     | $k_{IC}$             | $k_{ISC}$<br>( $T_1 \rightarrow S_0$ ) | $\langle S_0   \hat{\mathcal{H}}_{SO}   T_1 \rangle$ | $k_{ISC}$<br>( $S_1 \rightarrow T_1$ ) | $\langle S_1   \hat{\mathcal{H}}_{SO}   T_1 \rangle$ | $k_{ISC}$<br>( $S_1 \rightarrow T_2$ ) | $\langle S_1   \hat{\mathcal{H}}_{SO}   T_2 \rangle$ |
|-----|----------------------|----------------------------------------|------------------------------------------------------|----------------------------------------|------------------------------------------------------|----------------------------------------|------------------------------------------------------|
| QP1 | $6.3 \times 10^{11}$ | –                                      | –                                                    | $7.6 \times 10^{6a}$                   | 0.44 <sup>a</sup>                                    | $1.5 \times 10^{7a}$                   | 0.27 <sup>a</sup>                                    |
| QP1 | $3.4 \times 10^{11}$ | $2.0 \times 10^8$                      | 6.25                                                 | $7.7 \times 10^{4b}$                   | 0.68 <sup>b</sup>                                    | $7.2 \times 10^{2b}$                   | 2.35 <sup>b</sup>                                    |
| QT1 | $1.8 \times 10^{12}$ | $1.5 \times 10^6$                      | 0.11                                                 | $6.8 \times 10^6$                      | 0.31                                                 | $1.5 \times 10^5$                      | 0.22                                                 |

<sup>a</sup> localized excited state  $S_1^{LE}$ .

<sup>b</sup> delocalized excited state  $S_1^{DE}$ .

# Electronic structure and computational potential energy surfaces

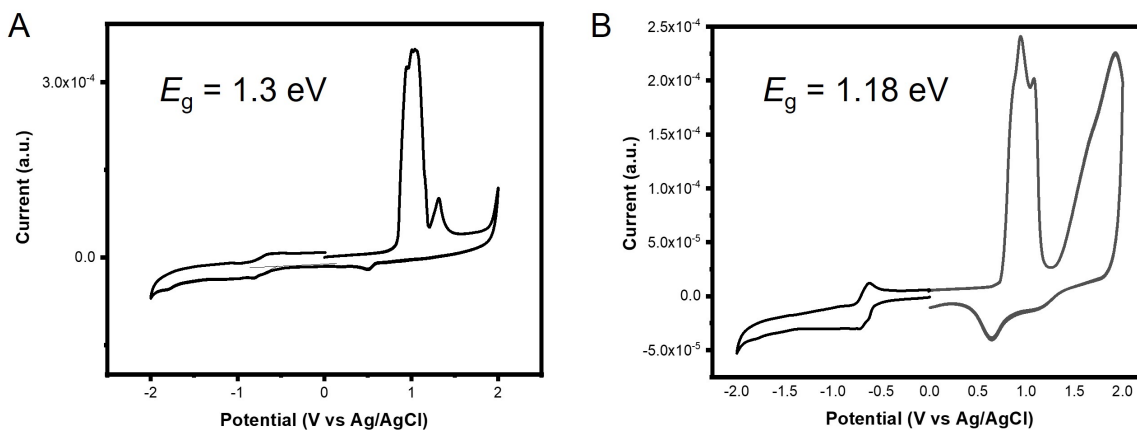

**Figure S2:** CV curves for QP2 (a) and QT2 (b).



|                      | QP1                                                                                 | QT1                                                                                  |
|----------------------|-------------------------------------------------------------------------------------|--------------------------------------------------------------------------------------|
| LUMO+1               | 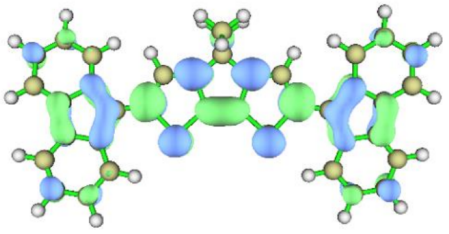   |    |
| LUMO                 |    |    |
| HOMO                 |   |   |
| HOMO-1               |  |  |
| HOMO-2               |  |  |
| <b>S<sub>1</sub></b> | <b>HOMO → LUMO (98.7 %)</b>                                                         | <b>S<sub>1</sub> HOMO-2 → LUMO (98.6 %)</b>                                          |
|                      |                                                                                     | <b>S<sub>2</sub> HOMO-1 → LUMO (98.6 %)</b>                                          |
|                      |                                                                                     | <b>S<sub>3</sub> HOMO → LUMO (100 %)</b>                                             |
| <b>T<sub>1</sub></b> | <b>HOMO → LUMO (96.5 %)</b>                                                         | <b>T<sub>1</sub> HOMO → LUMO (96.3 %)</b>                                            |

**Figure S3:** Frontier molecular orbitals with the isovalue of 0.03 a.u. and electronic transitions in the low-lying singlet and triplet states for QP1 and QT1 simulated at the TD-B3LYP/cc-pVDZ level.

|                      | QP2                                                                                 | QT2                                                                                  |
|----------------------|-------------------------------------------------------------------------------------|--------------------------------------------------------------------------------------|
| LUMO+1               | 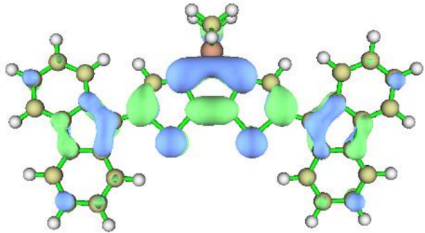   |    |
| LUMO                 |    |    |
| HOMO                 |   |   |
| HOMO-1               |  |  |
| HOMO-2               |  |  |
| <b>S<sub>1</sub></b> | <b>HOMO → LUMO (100.0 %)</b>                                                        | <b>S<sub>1</sub> HOMO-2 → LUMO (76.9 %)</b>                                          |
|                      |                                                                                     | <b>S<sub>2</sub> HOMO-1 → LUMO (76.9 %)</b>                                          |
|                      |                                                                                     | <b>S<sub>3</sub> HOMO → LUMO (100 %)</b>                                             |
| <b>T<sub>1</sub></b> | <b>HOMO → LUMO (96.4 %)</b>                                                         | <b>T<sub>1</sub> HOMO → LUMO (96.1 %)</b>                                            |

**Figure S4:** Frontier molecular orbitals with the isovalue of 0.03 a.u. and electronic transitions in the low-lying singlet and triplet states for QP2 and QT2 simulated at the TD-B3LYP/cc-pVDZ level.

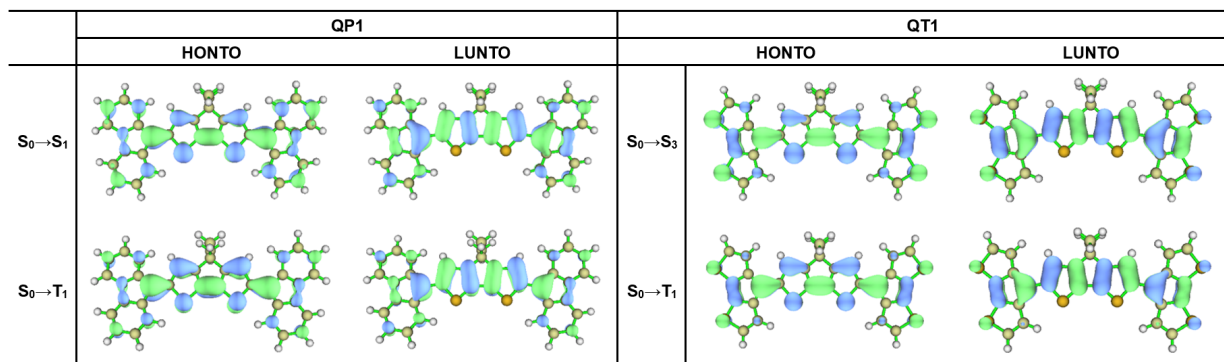

**Figure S5:** Natural transition orbitals (NTOs) in the bright singlet state and triplet state for QP1 and QT1 simulated at the TD-B3LYP/cc-pVDZ level with the isovalue of 0.03 a.u.

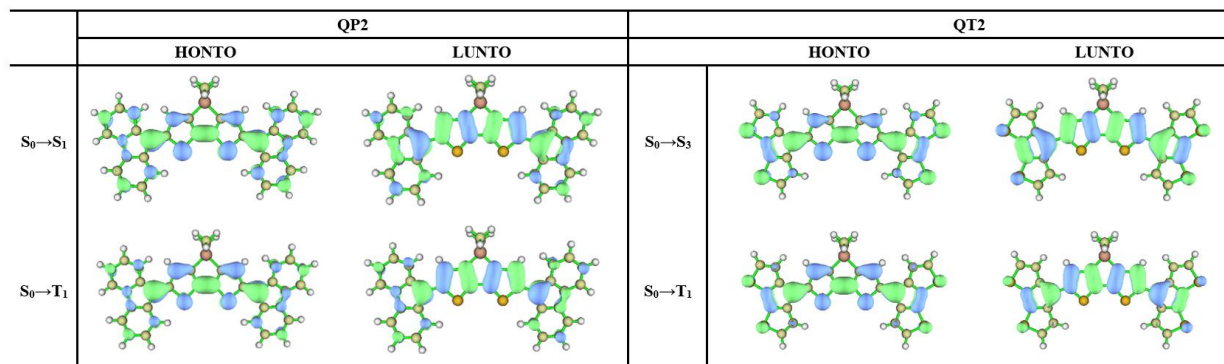

**Figure S6:** Natural transition orbitals (NTOs) in the bright singlet state and triplet state for QP2 and QT2 with the isovalue of 0.03 a.u. simulated at the TD-B3LYP/cc-pVDZ level.

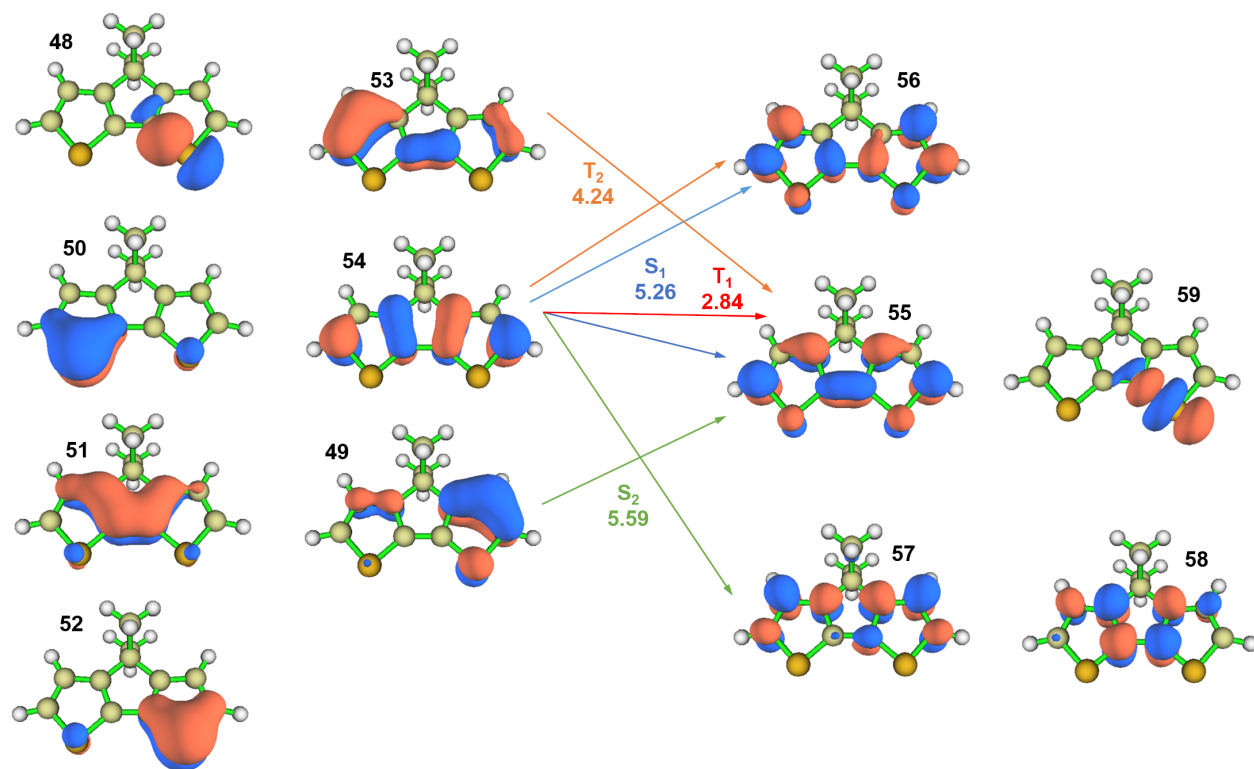

**Figure S7:** Excitation energies and electronic transitions in low-lying excited states calculated at the MS-CASPT2(14e,12o)/cc-pVDZ level in the DFT optimized structures.



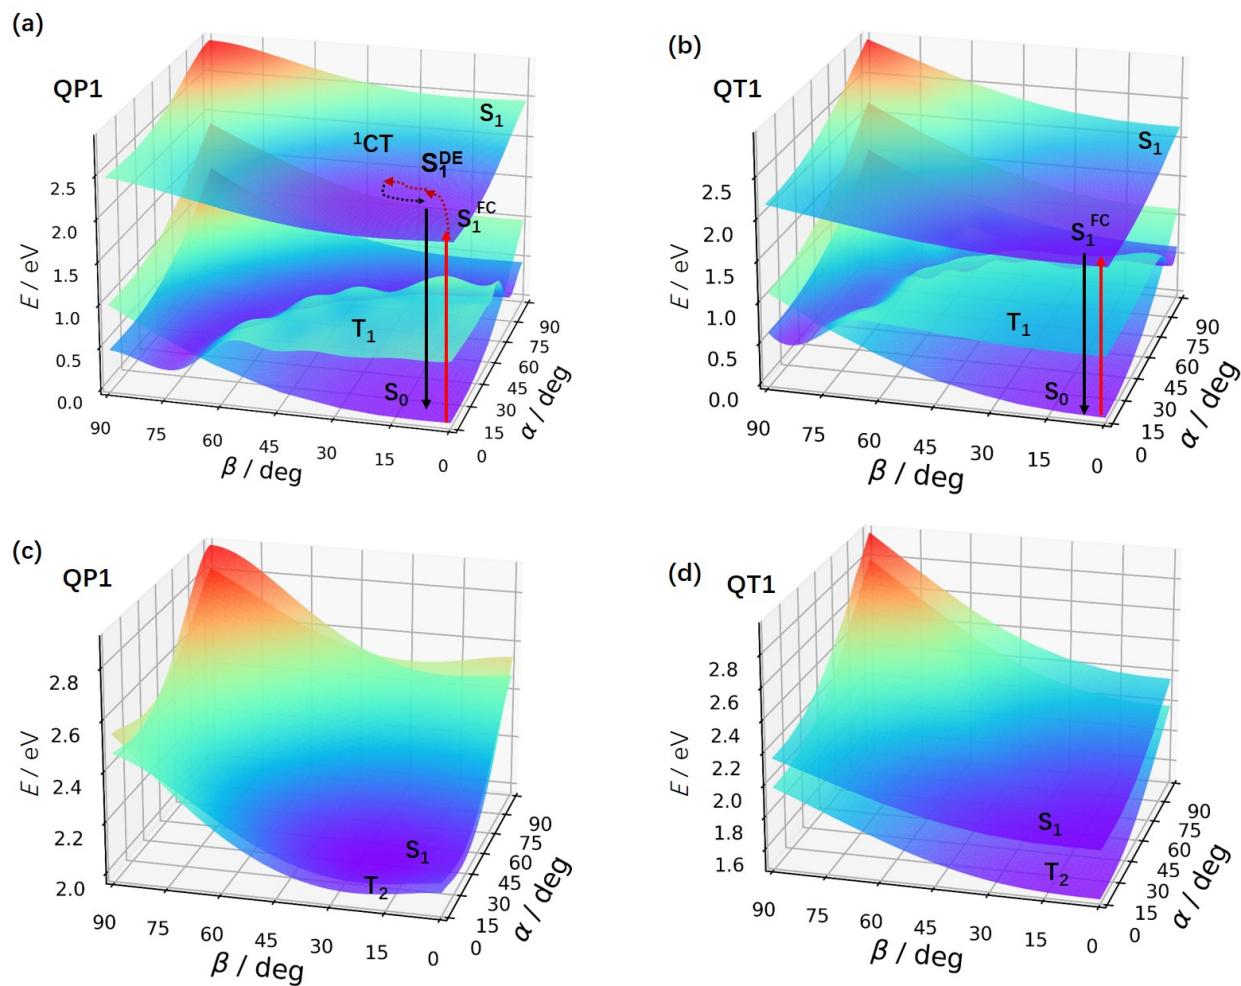

**Figure S8:** PESs in  $S_0$ ,  $S_1$ , and  $T_1$  states for QP1 (a) and QT1 (b), which show conical intersection between  $S_0$  and  $T_1$  states. PESs in  $S_1$  and  $T_2$  states for QP1 (c) and QT1 (d).

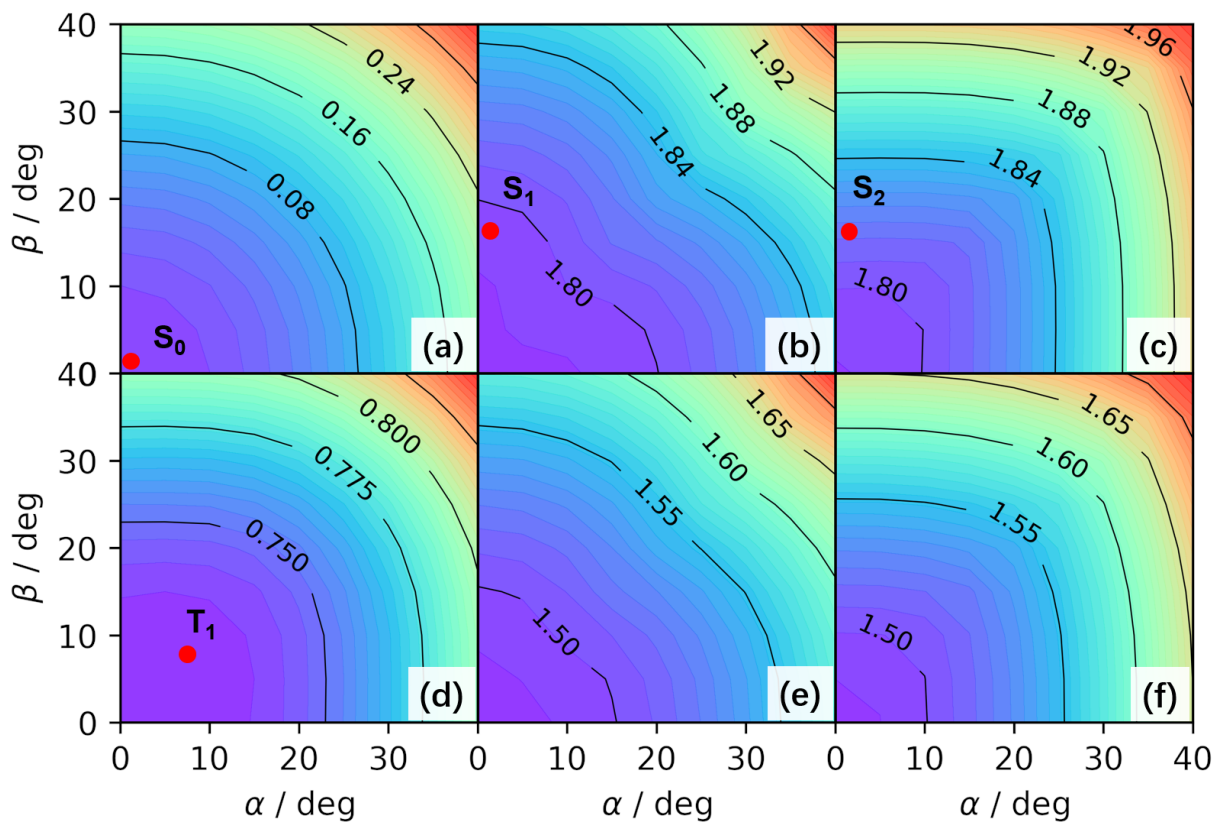

**Figure S9:** Two-dimensional contour plots of the PESs for QT1 in (a)  $S_0$ , (b)  $S_1$ , (c)  $S_2$ , (d)  $T_1$ , (e)  $T_2$ , and (f)  $T_3$  states with the optimized structure marked in a red circle in each of the contours.

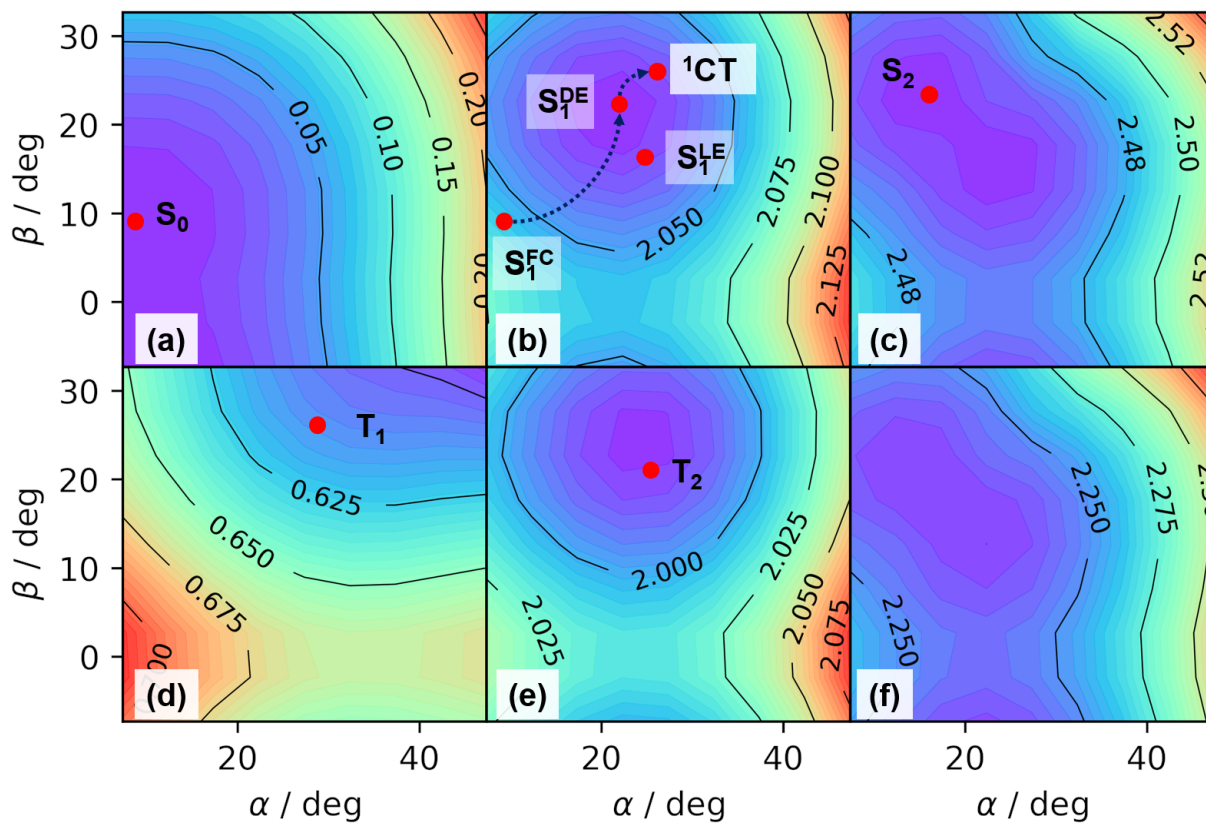

**Figure S10:** Two-dimensional contour plots of the PESs for QP1 in (a) S<sub>0</sub>, (b) S<sub>1</sub>, (c) S<sub>2</sub>, (d) T<sub>1</sub>, (e) T<sub>2</sub>, and (f) T<sub>3</sub> state with the optimized structure marked in a red circle in each of the contours.

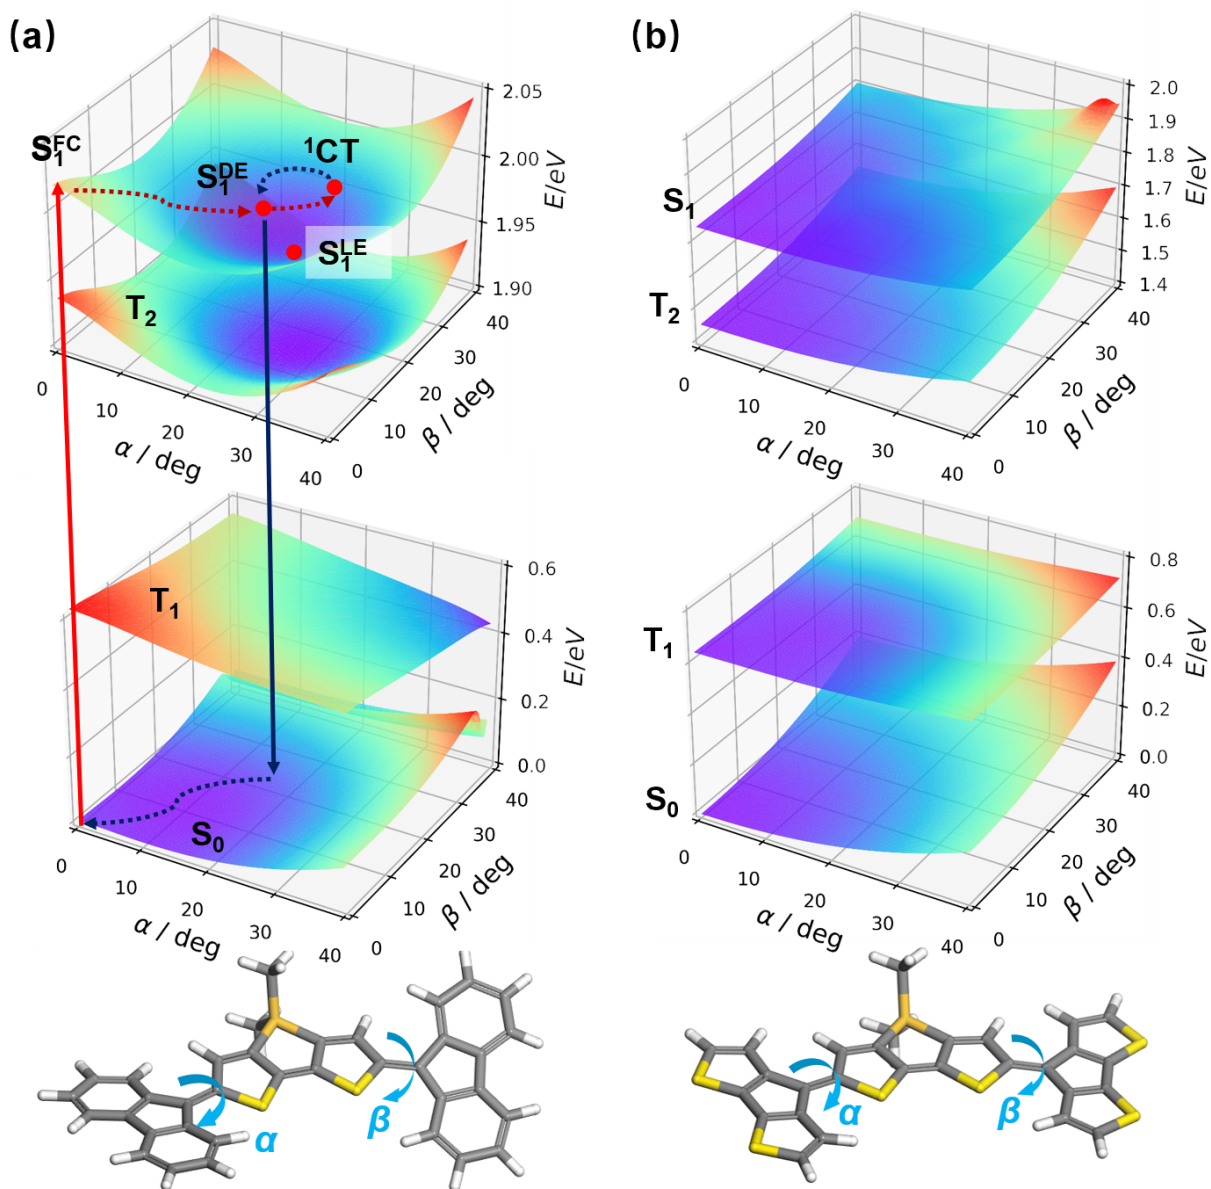

Figure S11: PESs in  $S_0$ ,  $S_1$ ,  $T_1$ , and  $T_2$  states for QP2 (a) and QT2 (b).



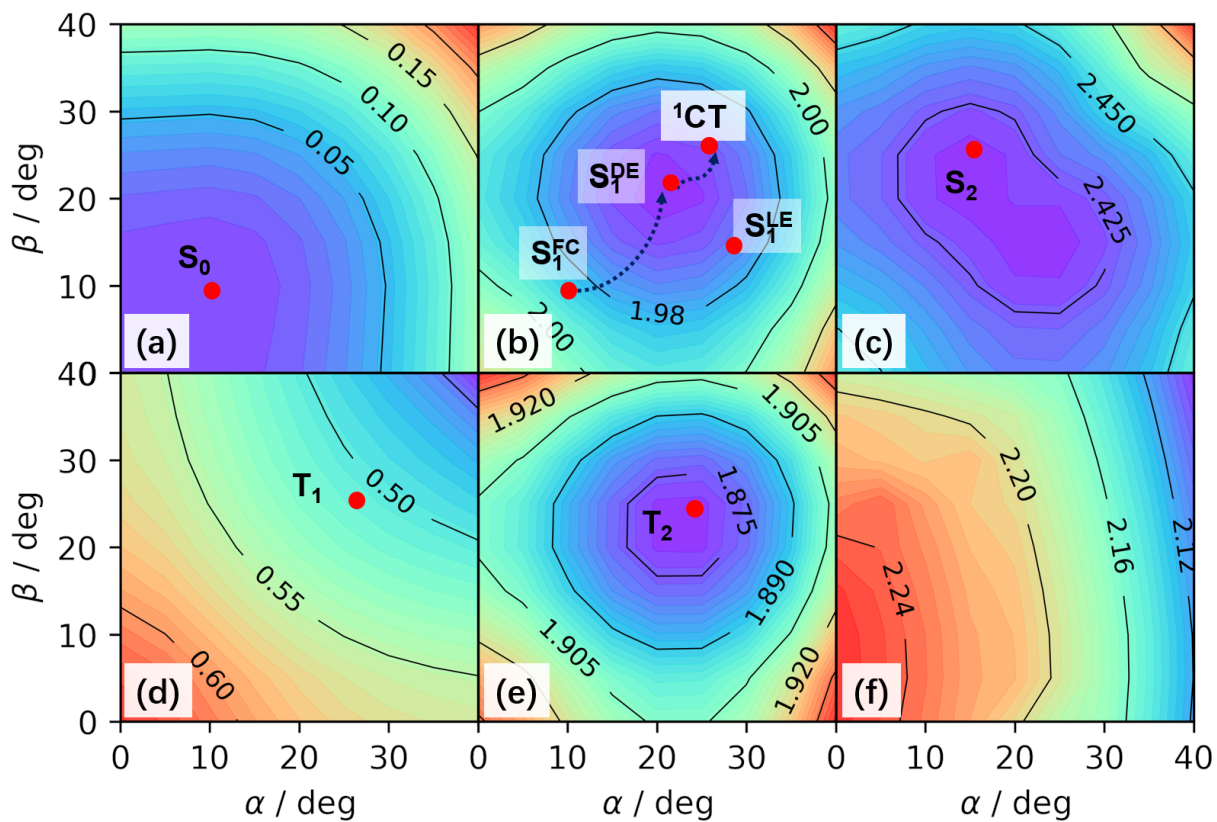

**Figure S12:** PESs of QP2 in (a)  $S_0$ , (b)  $S_1$ , (c)  $S_2$ , (d)  $T_1$ , (e)  $T_2$ , and (f)  $T_3$  states with the optimized structure marked in a red circle in each of the contours.

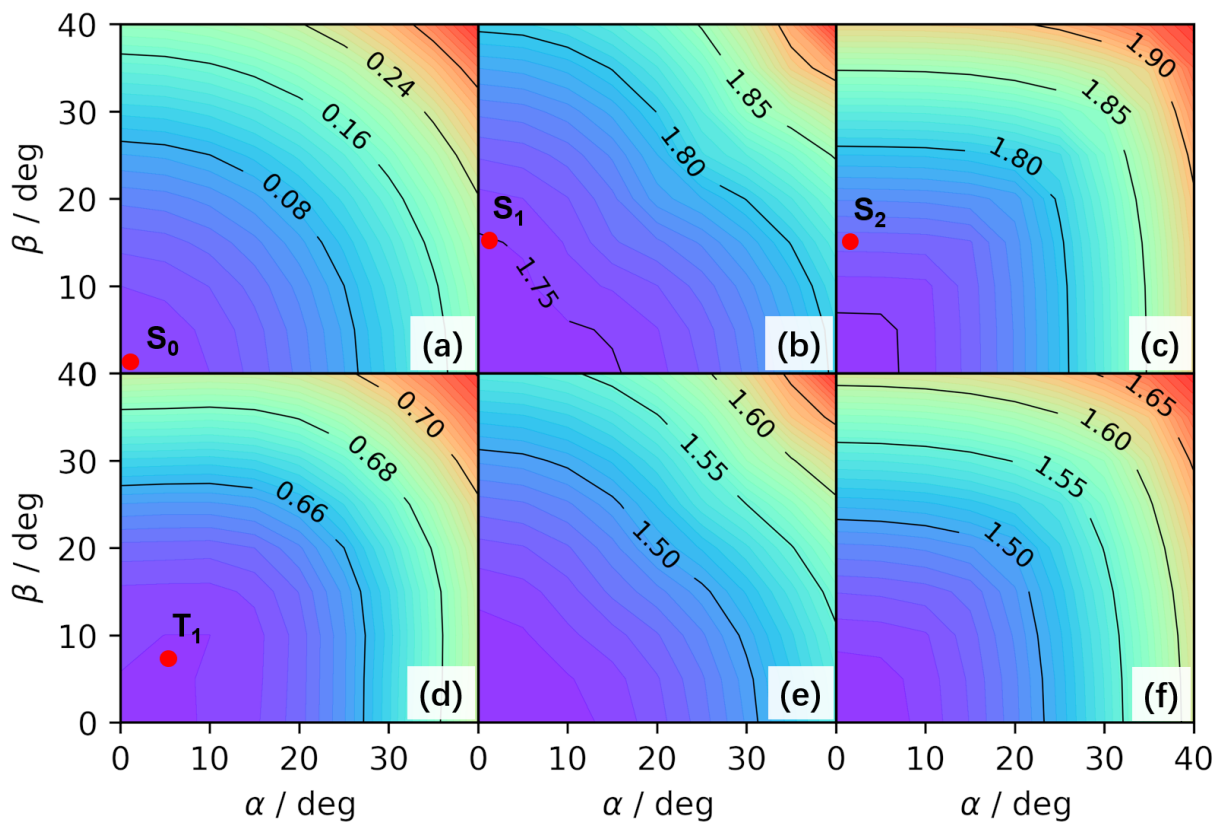

**Figure S13:** PESs of QT2 in (a)  $S_0$ , (b)  $S_1$ , (c)  $S_2$ , (d)  $T_1$ , (e)  $T_2$ , and (f)  $T_3$  states calculated at the B3LYP/cc-pVDZ level with the optimized structure marked in a red circle in each of the contours.

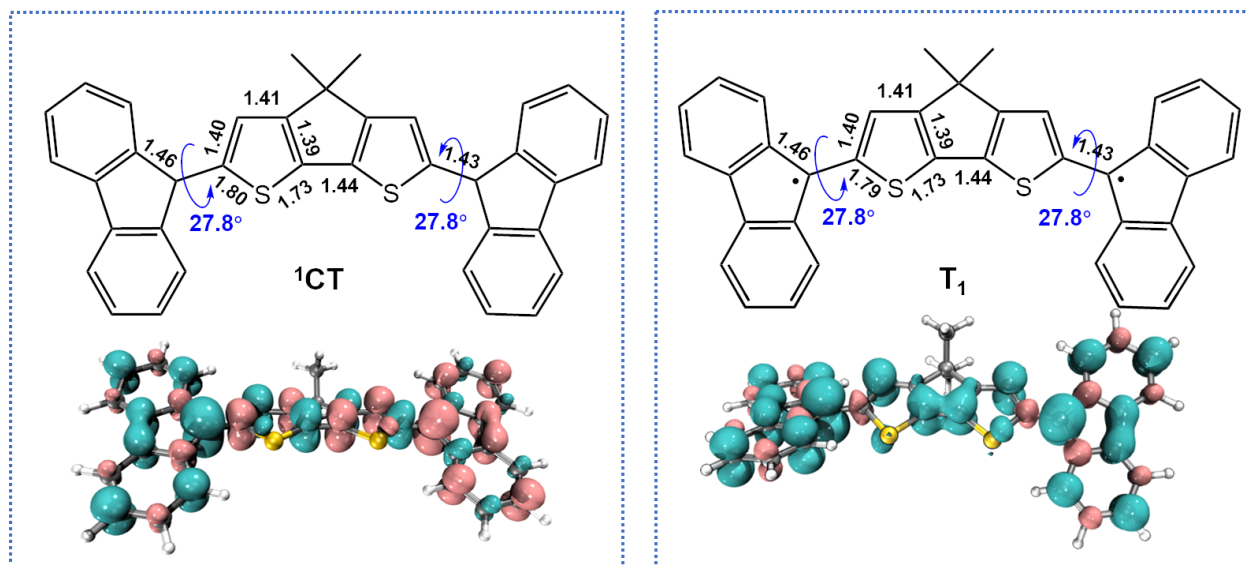

**Figure S14:** Electron spin density of QP1 in  $^1\text{CT}$  (left) and  $\text{T}_1$  (right) states calculated at the unrestricted B3LYP/cc-pVDZ level. Bond lengths and torsion angles are marked in black and blue respectively. The unpaired electron components are represented in cyan and pink for various spin orientations.

## Ultrafast spectra measured in solution and thin film

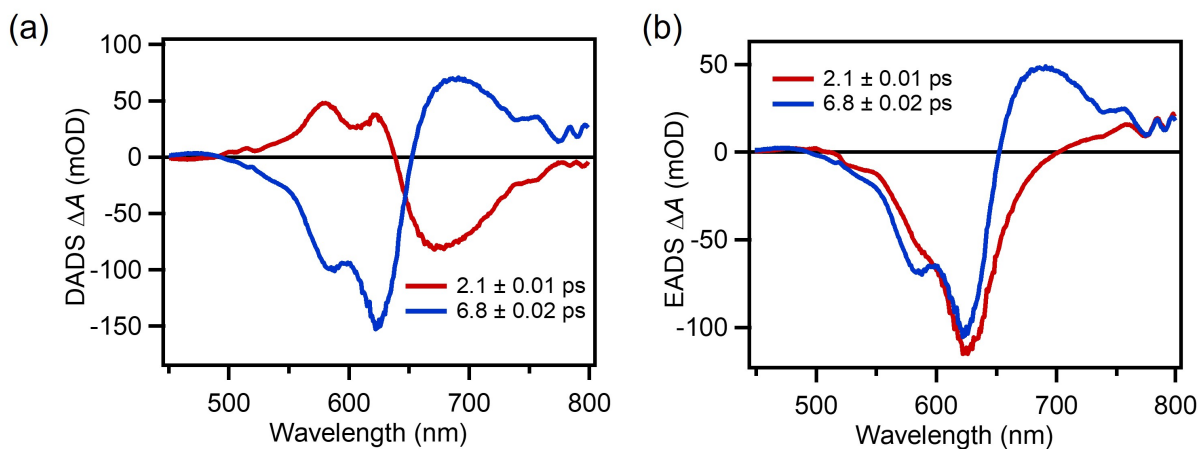

**Figure S15:** Global analysis of (a) decay-associated difference spectra (DADS) and (b) evolution-associated difference spectra (EADS) of QP1 in dilute DCM solution.

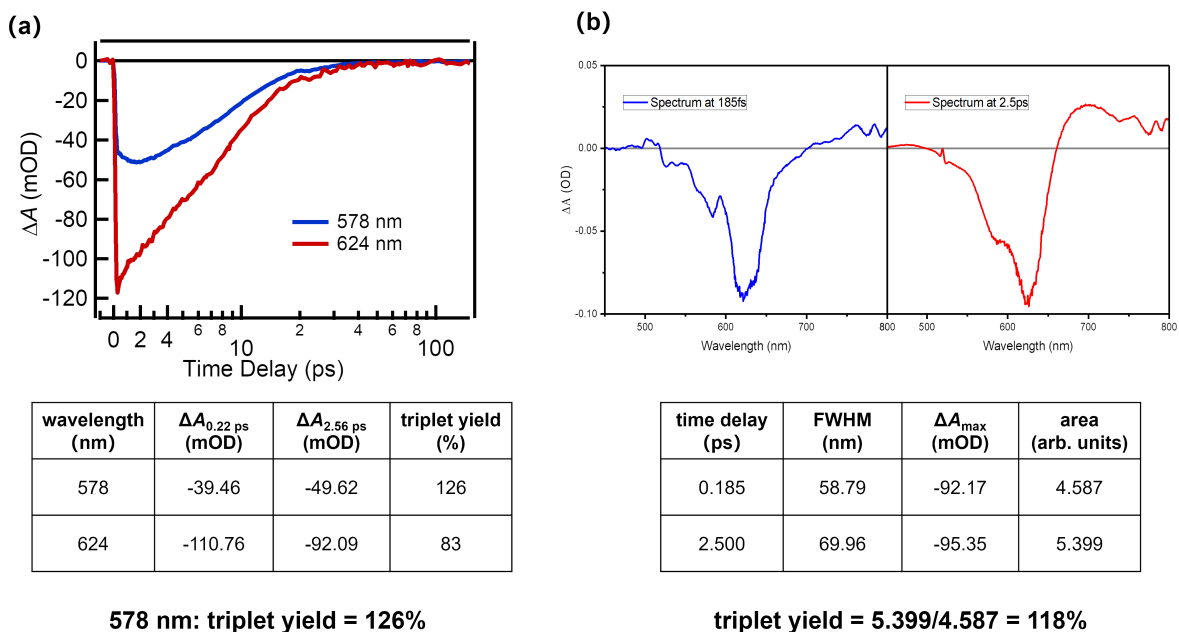

**Figure S16:** The triplet yield of QP1 was estimated using two different methods. (a) The ratio method, which was probed by wavelengths of 578 nm and 624 nm. (b) The area approach, which was probed at time delays of 0.185 ps and 2.5 ps.

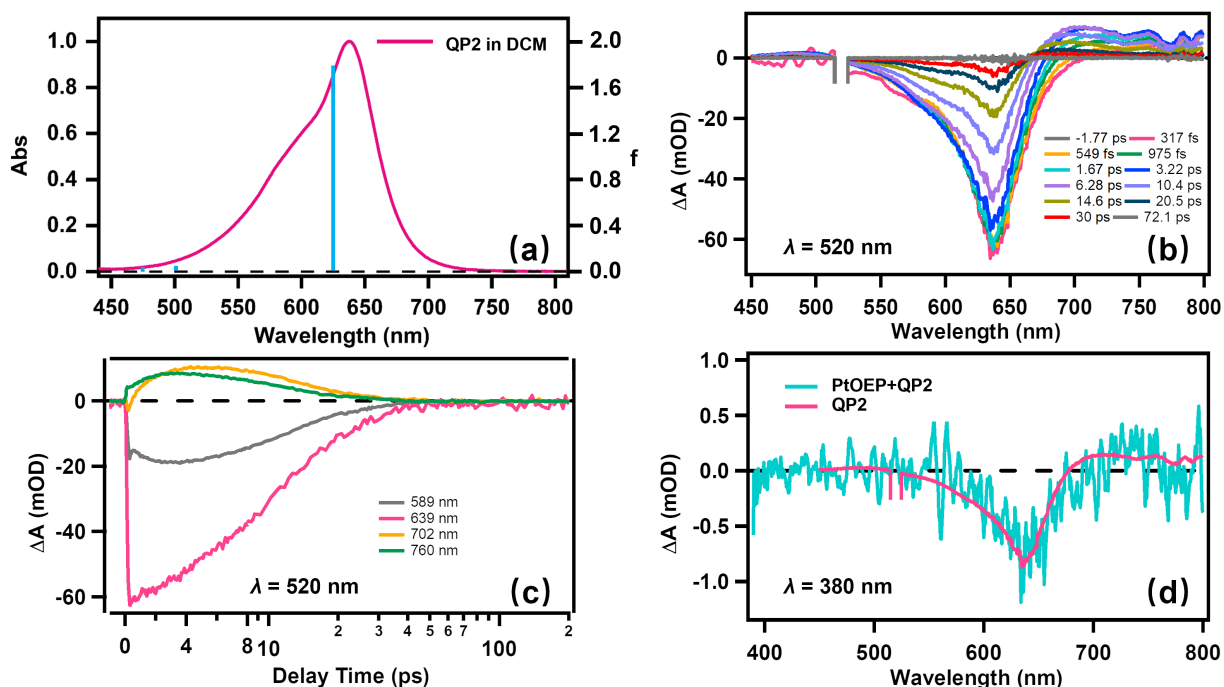

**Figure S17:** Steady-state absorption spectra with calculated excitation marked in blue bar (a), transient absorption spectrum (b), and kinetic decay measurements excited at 520 nm (c) in dilute DCM solution for QP2. (d) Triplet-sensitization measurements at a time delay of 3.0 ps in magenta for QP2, and 4.2  $\mu\text{s}$  with PtOEP sensitizer in cyan.

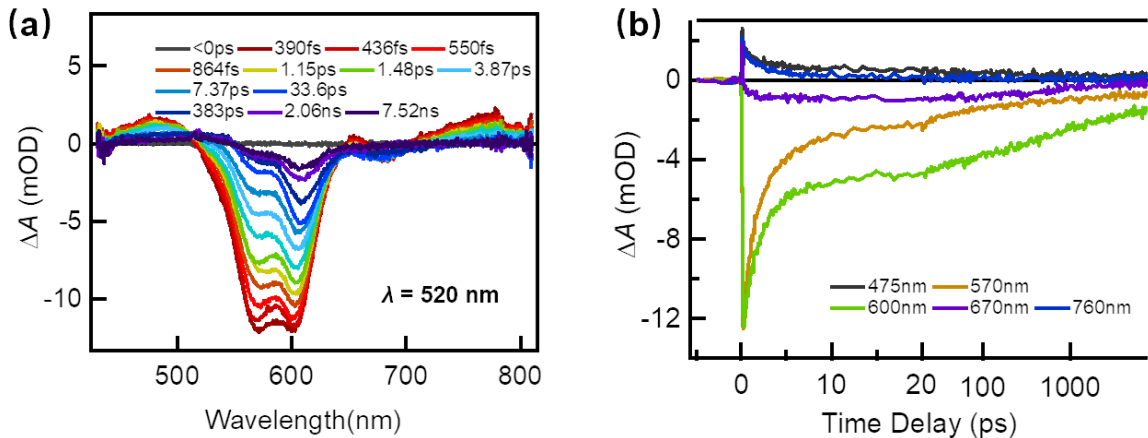

**Figure S18:** Transient absorption spectrum (a) and kinetic decay measurements excited at 520 nm in a thin film for QP2.

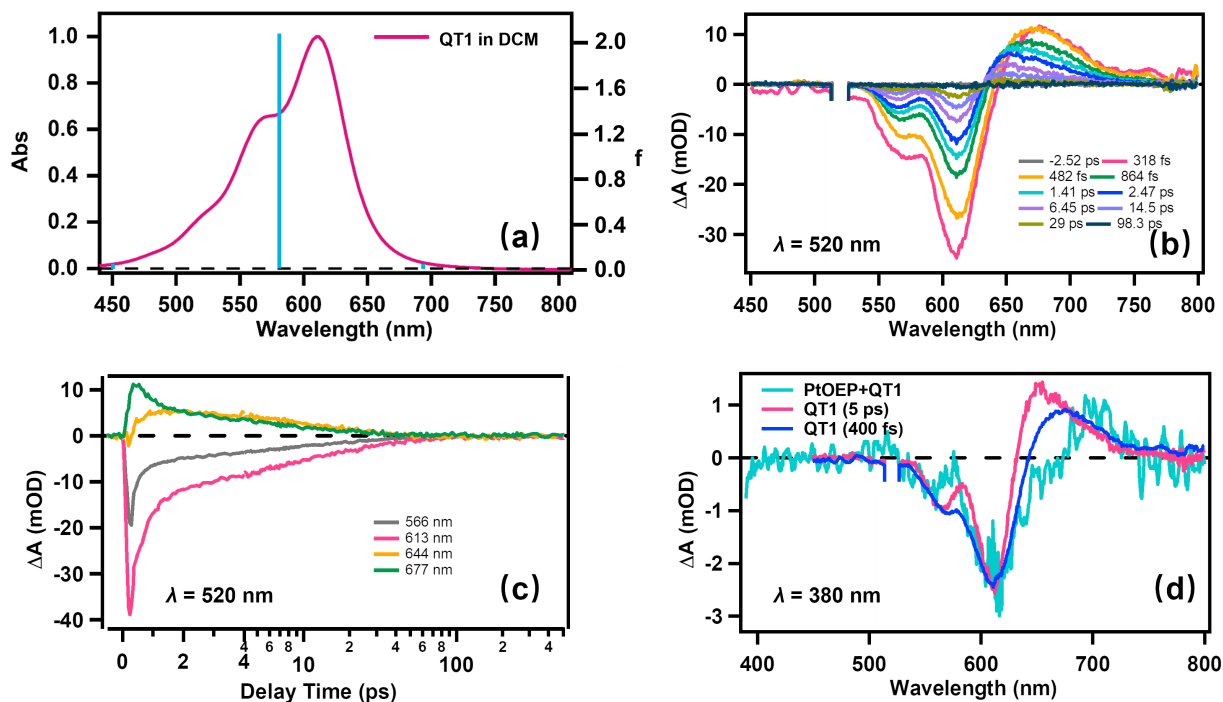

**Figure S19:** Steady-state absorption spectra with calculated excitation marked in blue bar (a), transient absorption spectrum (b), and kinetic decay measurements excited at 520 nm (c) in dilute DCM solution for QT1. (d) Triplet-sensitization measurements at a time delay of 400 fs in blue and 5 ps in magenta for QT1, and 5  $\mu\text{s}$  with PtOEP sensitizer in cyan.

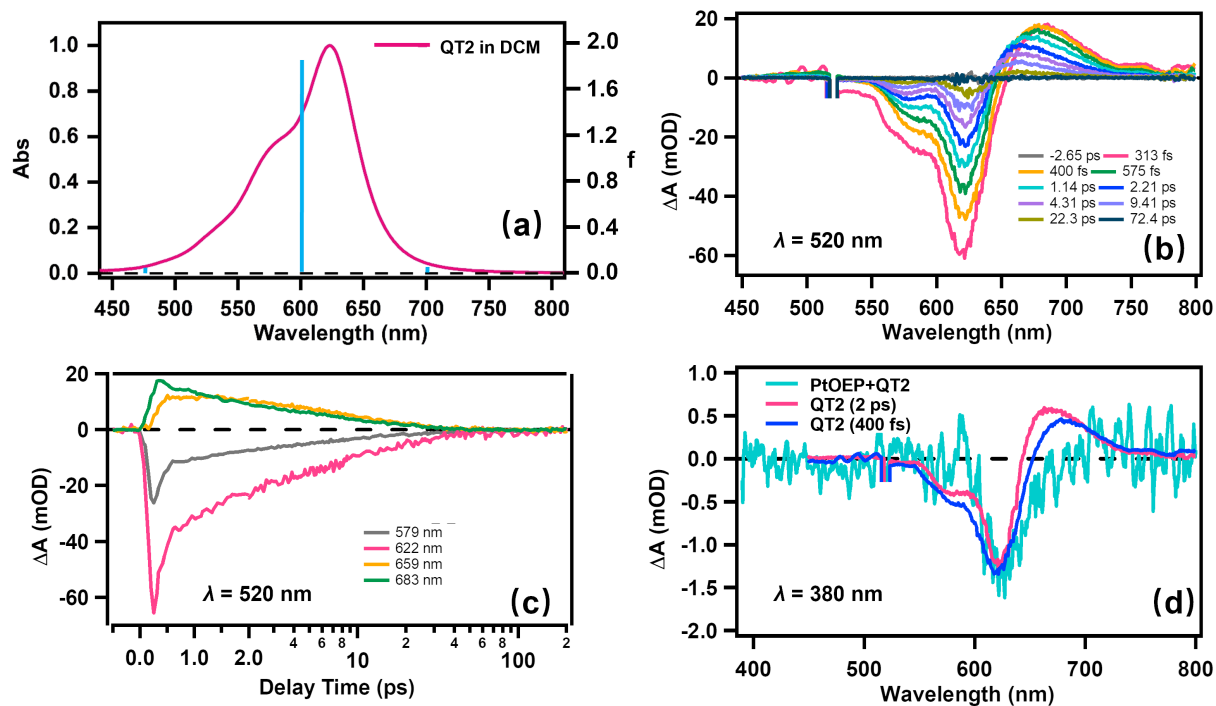

**Figure S20:** Steady-state absorption spectra with calculated excitation marked in blue bar (a), transient absorption spectrum (b), and kinetic decay measurements excited at 520 nm (c) in dilute DCM solution for QT2. (d) Triplet-sensitization measurements at a time delay of 400 fs in blue and 2 ps in magenta for QT2, and 4.7  $\mu$ s with PtOEP sensitizer in cyan.

## Optimized structures of QT1

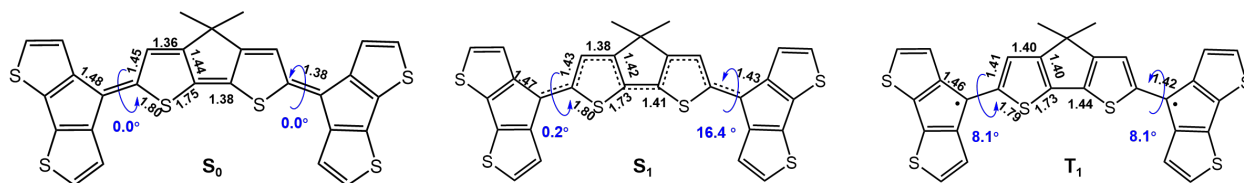

**Figure S21:** Optimized structures ((bond lengths in black and torsion angles in blue) of QT1 in different states with unpaired-electron components obtained at the B3LYP/cc-pVDZ level.



Optimized coordinates in low-lying excited states of QPs  
and QTs.

**Table S11:** Coordinates of the optimized minimum in the  $S_0$  state of QP1 at the B3LYP/cc-pVDZ level.

|   |             |             |             |
|---|-------------|-------------|-------------|
| C | 3.22469600  | 0.12894500  | 0.02850200  |
| S | 1.99781500  | -1.20285700 | 0.01143100  |
| C | 0.68991500  | -0.05186100 | 0.00810600  |
| C | 1.17235000  | 1.30134300  | 0.01410400  |
| C | 2.53298600  | 1.40067400  | 0.02604800  |
| C | -0.68994600 | -0.05183400 | -0.00810600 |
| S | -1.99788900 | -1.20278000 | -0.01144400 |
| C | -3.22472000 | 0.12906600  | -0.02853200 |
| C | -2.53296300 | 1.40077100  | -0.02601000 |
| C | -1.17233100 | 1.30138700  | -0.01406500 |
| C | 4.58613400  | -0.11361700 | 0.03266100  |
| C | -4.58615500 | -0.11351700 | -0.03269500 |
| C | 5.66170100  | 0.89409000  | 0.19989900  |
| C | 6.91867200  | 0.24163600  | 0.05645200  |
| C | 6.67793900  | -1.18192600 | -0.17479100 |
| C | 5.27290600  | -1.40638100 | -0.16919400 |
| C | -5.27281200 | -1.40633200 | 0.16916600  |
| C | -6.67786100 | -1.18200400 | 0.17480900  |
| C | -6.91872700 | 0.24153300  | -0.05644500 |
| C | -5.66181700 | 0.89410000  | -0.19994900 |
| C | 0.00002800  | 2.28487000  | 0.00004300  |
| C | 0.01397400  | 3.16360900  | -1.26858500 |
| C | -0.01388600 | 3.16355100  | 1.26871200  |
| H | 3.07164000  | 2.34178700  | -0.01330400 |
| H | -3.07157200 | 2.34190200  | 0.01339400  |
| H | 0.02367800  | 2.54776800  | -2.18026600 |
| H | 0.90567100  | 3.81067000  | -1.27931800 |
| H | -0.02361300 | 2.54766800  | 2.18036400  |
| H | -0.90555900 | 3.81064400  | 1.27947600  |
| H | -0.87727900 | 3.81065200  | -1.29820800 |
| H | 0.87739100  | 3.81055900  | 1.29836600  |
| C | 4.79663000  | -2.71077300 | -0.37336900 |
| C | 5.70567700  | -3.75660400 | -0.56844300 |
| C | 7.08648000  | -3.52240900 | -0.56906600 |
| C | 7.57883500  | -2.22785000 | -0.37387800 |
| C | 8.11961700  | 0.94307400  | 0.16838500  |
| C | 8.08625500  | 2.31366900  | 0.44192400  |
| C | 6.85765500  | 2.96217500  | 0.61903900  |
| C | 5.65059400  | 2.26358200  | 0.50675000  |
| C | -7.57865100 | -2.22801200 | 0.37392900  |
| C | -7.08616700 | -3.52252400 | 0.56910700  |
| C | -5.70534000 | -3.75659000 | 0.56843900  |
| C | -4.79640000 | -2.71067300 | 0.37333100  |
| C | -5.65086600 | 2.26358300  | -0.50686600 |
| C | -6.85799900 | 2.96205300  | -0.61913300 |
| C | -8.08652900 | 2.31343800  | -0.44194000 |
| C | -8.11974400 | 0.94285000  | -0.16835600 |
| H | 3.73242400  | -2.93901300 | -0.38928400 |
| H | 5.32738600  | -4.76934200 | -0.72315900 |
| H | 7.77962900  | -4.35211700 | -0.72372000 |
| H | 8.65499200  | -2.04052900 | -0.37824700 |
| H | 9.07526100  | 0.42672000  | 0.05282000  |
| H | 9.01808200  | 2.87601200  | 0.53201100  |
| H | 6.83653900  | 4.02806900  | 0.85654400  |
| H | 4.72453200  | 2.80362300  | 0.69262200  |
| H | -8.65482700 | -2.04079300 | 0.37832900  |
| H | -7.77923200 | -4.35229700 | 0.72378700  |
| H | -5.32694800 | -4.76929100 | 0.72314900  |
| H | -3.73216600 | -2.93880000 | 0.38921500  |
| H | -4.72487800 | 2.80371400  | -0.69281400 |
| H | -6.83699800 | 4.02793800  | -0.85668600 |
| H | -9.01841500 | 2.87568600  | -0.53201600 |
| H | -9.07533300 | 0.42640500  | -0.05274500 |

**Table S12:** Coordinates of the optimized minimum in the  $S_1^{\text{LE}}$  state of QP1 at the B3LYP/cc-pVDZ level.

|   |          |          |          |
|---|----------|----------|----------|
| C | -3.24610 | -0.13760 | -0.00800 |
| S | -2.01340 | 1.17910  | -0.08800 |
| C | -0.71920 | 0.02900  | -0.01170 |
| C | -1.19460 | -1.30070 | 0.06780  |
| C | -2.57470 | -1.39530 | 0.07090  |
| C | 0.69290  | 0.01850  | -0.02500 |
| S | 2.01300  | 1.15540  | -0.08430 |
| C | 3.21200  | -0.16740 | 0.04230  |
| C | 2.54970  | -1.40930 | 0.09850  |
| C | 1.15440  | -1.30460 | 0.05710  |
| C | -4.62180 | 0.12630  | -0.02020 |
| C | 4.61800  | 0.10060  | 0.03720  |
| C | -5.68690 | -0.82380 | 0.33750  |
| C | -6.95050 | -0.18990 | 0.14100  |
| C | -6.70850 | 1.17240  | -0.32610 |
| C | -5.29730 | 1.36950  | -0.41000 |
| C | 5.29860  | 1.29470  | 0.46730  |
| C | 6.74990  | 1.11390  | 0.30020  |
| C | 6.96360  | -0.16040 | -0.22890 |
| C | 5.64780  | -0.80090 | -0.40250 |
| C | -0.02090 | -2.28250 | 0.11580  |
| C | -0.02580 | -3.22760 | -1.10450 |
| C | -0.01610 | -3.09370 | 1.42850  |
| H | -3.12100 | -2.33430 | 0.06770  |
| H | 3.09040  | -2.34450 | 0.22880  |
| H | -0.03090 | -2.65950 | -2.04670 |
| H | -0.91660 | -3.87630 | -1.08790 |
| H | -0.01520 | -2.42950 | 2.30570  |
| H | 0.87640  | -3.73820 | 1.48220  |
| H | 0.86650  | -3.87450 | -1.09530 |
| H | -0.90660 | -3.74040 | 1.48620  |
| C | -4.81420 | 2.61050  | -0.86140 |
| C | -5.71720 | 3.62410  | -1.19540 |
| C | -7.10130 | 3.42160  | -1.09700 |
| C | -7.60170 | 2.18810  | -0.66560 |
| C | -8.14480 | -0.85660 | 0.41460  |
| C | -8.10030 | -2.16650 | 0.90380  |
| C | -6.86490 | -2.78830 | 1.13480  |
| C | -5.66320 | -2.12730 | 0.86350  |
| C | 7.67170  | 2.14390  | 0.66190  |
| C | 7.19090  | 3.31870  | 1.18150  |
| C | 5.77940  | 3.48900  | 1.36060  |
| C | 4.85180  | 2.51190  | 1.01560  |
| C | 5.61880  | -2.08550 | -0.98170 |
| C | 6.81130  | -2.70330 | -1.33620 |
| C | 8.09290  | -2.09150 | -1.13730 |
| C | 8.16850  | -0.83310 | -0.59680 |
| H | -3.74750 | 2.80200  | -0.97100 |
| H | -5.33440 | 4.58670  | -1.54190 |
| H | -7.78980 | 4.22670  | -1.36300 |
| H | -8.67980 | 2.02370  | -0.59900 |
| H | -9.10510 | -0.35940 | 0.25790  |
| H | -9.02820 | -2.70020 | 1.12080  |
| H | -6.83700 | -3.80180 | 1.54160  |
| H | -4.72580 | -2.62940 | 1.09740  |
| H | 8.74360  | 1.98680  | 0.52410  |
| H | 7.86840  | 4.12530  | 1.46500  |
| H | 5.41890  | 4.42720  | 1.78980  |
| H | 3.79160  | 2.69570  | 1.18650  |
| H | 4.67370  | -2.59030 | -1.17610 |
| H | 6.77510  | -3.69700 | -1.78990 |
| H | 8.99500  | -2.63190 | -1.42730 |
| H | 9.13230  | -0.34090 | -0.45110 |

**Table S13:** Coordinates of the optimized minimum in  $S_1^{\text{DE}}$  state of QP1 at the B3LYP/cc-pVDZ level.

|   |             |             |             |
|---|-------------|-------------|-------------|
| C | 3.22284400  | 0.15160900  | -0.04049800 |
| S | 2.00162200  | -1.17349900 | -0.02499400 |
| C | 0.70606900  | -0.01945100 | -0.00225800 |
| C | 1.17459000  | 1.31474200  | -0.00480300 |
| C | 2.56043000  | 1.41024500  | -0.02634000 |
| C | -0.70606900 | -0.01945200 | 0.00222600  |
| S | -2.00162000 | -1.17350200 | 0.02495500  |
| C | -3.22284400 | 0.15160400  | 0.04048200  |
| C | -2.56043200 | 1.41024100  | 0.02631600  |
| C | -1.17459200 | 1.31474000  | 0.00477400  |
| C | 4.60770300  | -0.11721600 | -0.04185400 |
| C | -4.60770200 | -0.11722200 | 0.04185300  |
| C | 5.65461800  | 0.80739400  | 0.39270800  |
| C | 6.92623000  | 0.17950000  | 0.20971700  |
| C | 6.69490900  | -1.15687100 | -0.33453800 |
| C | 5.28354800  | -1.33663500 | -0.47849200 |
| C | -5.28354400 | -1.33664100 | 0.47849500  |
| C | -6.69490600 | -1.15687500 | 0.33455700  |
| C | -6.92623200 | 0.17949800  | -0.20969000 |
| C | -5.65462100 | 0.80739100  | -0.39269300 |
| C | -0.00000200 | 2.29680400  | -0.00001600 |
| C | -0.00595500 | 3.17560000  | -1.26879300 |
| C | 0.00595100  | 3.17560400  | 1.26875800  |
| H | 3.11191700  | 2.34438400  | -0.10172200 |
| H | -3.11192100 | 2.34437900  | 0.10170200  |
| H | -0.01163400 | 2.55905000  | -2.18007500 |
| H | 0.88600100  | 3.82230500  | -1.29473800 |
| H | 0.01163000  | 2.55905700  | 2.18004200  |
| H | -0.88600700 | 3.82230800  | 1.29470100  |
| H | -0.89705400 | 3.82381200  | -1.28440900 |
| H | 0.89704900  | 3.82381700  | 1.28437200  |
| C | 4.80165700  | -2.54133100 | -1.02376600 |
| C | 5.70567200  | -3.54634400 | -1.38024900 |
| C | 7.08677100  | -3.36591900 | -1.21669700 |
| C | 7.58660300  | -2.16290500 | -0.69835900 |
| C | 8.10545700  | 0.83404100  | 0.55796600  |
| C | 8.03719300  | 2.12188200  | 1.10755100  |
| C | 6.79376800  | 2.73394700  | 1.32331500  |
| C | 5.60416700  | 2.08603900  | 0.97826000  |
| C | -7.58659800 | -2.16290900 | 0.69838500  |
| C | -7.08676200 | -3.36592500 | 1.21671300  |
| C | -5.70566100 | -3.54635300 | 1.38024900  |
| C | -4.80164900 | -2.54133900 | 1.02376000  |
| C | -5.60417500 | 2.08603900  | -0.97824000 |
| C | -6.79377800 | 2.73395000  | -1.32327900 |
| C | -8.03720100 | 2.12188600  | -1.10750400 |
| C | -8.10546100 | 0.83404300  | -0.55792300 |
| H | 3.73652800  | -2.70314500 | -1.19062600 |
| H | 5.32775400  | -4.48168100 | -1.79908100 |
| H | 7.77679900  | -4.16277900 | -1.50286500 |
| H | 8.66386000  | -2.01861600 | -0.58640200 |
| H | 9.07392000  | 0.34907400  | 0.41398100  |
| H | 8.95571500  | 2.64497500  | 1.38265200  |
| H | 6.75121100  | 3.72740500  | 1.77557800  |
| H | 4.65312300  | 2.57100600  | 1.19637700  |
| H | -8.66385600 | -2.01861800 | 0.58644100  |
| H | -7.77678700 | -4.16278500 | 1.50288600  |
| H | -5.32773900 | -4.48169200 | 1.79907300  |
| H | -3.73651800 | -2.70315700 | 1.19060600  |
| H | -4.65313200 | 2.57100500  | -1.19636500 |
| H | -6.75122400 | 3.72741000  | -1.77553800 |
| H | -8.95572600 | 2.64498200  | -1.38259200 |
| H | -9.07392300 | 0.34907700  | -0.41392900 |

**Table S14:** Coordinates of the optimized minimum in the  $^1\text{CT}$  state of QP1 at the B3LYP/cc-pVDZ level.

|   |             |             |             |
|---|-------------|-------------|-------------|
| S | 2.01687100  | 1.08561500  | -0.43764600 |
| C | 0.72063100  | 0.01312600  | -0.02515300 |
| C | 1.17394000  | -1.21057200 | 0.46138600  |
| C | 2.57890400  | -1.29885600 | 0.50478000  |
| C | -0.72074900 | 0.01289100  | -0.02615600 |
| S | -2.01692900 | 1.08615600  | -0.43704000 |
| C | -3.22622100 | -0.13743300 | 0.05541300  |
| C | -2.57911400 | -1.29974200 | 0.50203500  |
| C | -1.17416500 | -1.21129600 | 0.45922800  |
| C | 4.63155200  | 0.11331900  | -0.04349000 |
| C | -4.63149400 | 0.11315400  | -0.04430300 |
| C | 5.66586600  | -0.90728300 | -0.21039100 |
| C | 6.94101100  | -0.26569000 | -0.23311800 |
| C | 6.72410600  | 1.17544900  | -0.08770700 |
| C | 5.31783800  | 1.40146500  | 0.01868000  |
| C | -5.31767300 | 1.40103500  | 0.02060900  |
| C | -6.72397400 | 1.17535900  | -0.08579700 |
| C | -6.94096400 | -0.26543200 | -0.23523300 |
| C | -5.66586200 | -0.90712100 | -0.21325300 |
| C | -0.00015500 | -2.12146100 | 0.82847000  |
| C | -0.00152800 | -2.46057900 | 2.33450900  |
| C | 0.00107100  | -3.41336500 | -0.01625800 |
| H | 3.13248400  | -2.14809900 | 0.90025900  |
| H | -3.13281200 | -2.14977600 | 0.89585000  |
| H | -0.00199700 | -1.54705900 | 2.94784100  |
| H | 0.88912900  | -3.05351800 | 2.59835800  |
| H | 0.00245900  | -3.18483500 | -1.09265600 |
| H | -0.88998100 | -4.02224900 | 0.20697500  |
| H | -0.89273700 | -3.05340100 | 2.59679600  |
| H | 0.89166700  | -4.02207300 | 0.20929300  |
| C | 4.84451900  | 2.71167200  | 0.20257600  |
| C | 5.75740900  | 3.76996800  | 0.24889900  |
| C | 7.13503400  | 3.53945300  | 0.12702400  |
| C | 7.62500100  | 2.23625100  | -0.03569300 |
| C | 8.11014400  | -1.00467600 | -0.39844600 |
| C | 8.02223000  | -2.39489900 | -0.55428700 |
| C | 6.77246000  | -3.03048900 | -0.56242600 |
| C | 5.59280900  | -2.29737200 | -0.39860700 |
| C | -7.62487300 | 2.23581400  | -0.03038100 |
| C | -7.13483700 | 3.53869600  | 0.13536800  |
| C | -5.75712300 | 3.76884500  | 0.25721300  |
| C | -4.84419300 | 2.71073800  | 0.20793000  |
| C | -5.59272700 | -2.29684400 | -0.40359100 |
| C | -6.77239700 | -3.02952100 | -0.56914300 |
| C | -8.02213800 | -2.39380100 | -0.56084000 |
| C | -8.11015400 | -1.00388600 | -0.40258000 |
| H | 3.78044000  | 2.91619100  | 0.32322300  |
| H | 5.38985600  | 4.78896500  | 0.38786600  |
| H | 7.83142700  | 4.37985800  | 0.16681900  |
| H | 8.70000900  | 2.05876400  | -0.11554400 |
| H | 9.08412000  | -0.51008900 | -0.41514000 |
| H | 8.93202400  | -2.98510900 | -0.68352500 |
| H | 6.71706800  | -4.11169100 | -0.70706900 |
| H | 4.63176100  | -2.80940000 | -0.44491300 |
| H | -8.69987500 | 2.05859200  | -0.11078100 |
| H | -7.83131700 | 4.37890400  | 0.17784300  |
| H | -5.38951500 | 4.78740500  | 0.39909300  |
| H | -3.77999600 | 2.91493500  | 0.32856400  |
| H | -4.63166400 | -2.80896200 | -0.44995000 |
| H | -6.71688400 | -4.11049200 | -0.71535800 |
| H | -8.93194200 | -2.98366000 | -0.69167500 |
| H | -9.08404100 | -0.50913300 | -0.41910800 |

**Table S15:** Coordinates of the optimized minimum in the  $S_2$  state of QP1 at the B3LYP/cc-pVDZ level.

|   |             |             |             |
|---|-------------|-------------|-------------|
| C | 3.21196200  | -0.16738600 | 0.04234500  |
| S | 2.01295300  | 1.15542700  | -0.08437100 |
| C | 0.69288900  | 0.01846700  | -0.02494300 |
| C | 1.15439400  | -1.30460600 | 0.05723300  |
| C | 2.54969800  | -1.40925800 | 0.09862900  |
| C | -0.71920600 | 0.02896900  | -0.01181100 |
| S | -2.01338800 | 1.17903400  | -0.08809100 |
| C | -3.24606000 | -0.13772800 | -0.00814500 |
| C | -2.57473000 | -1.39540100 | 0.07084600  |
| C | -1.19460700 | -1.30079900 | 0.06779700  |
| C | 4.61795500  | 0.10063500  | 0.03725200  |
| C | -4.62177200 | 0.12618100  | -0.02037600 |
| C | 5.64779900  | -0.80078300 | -0.40262300 |
| C | 6.96364300  | -0.16034500 | -0.22899600 |
| C | 6.74988200  | 1.11395800  | 0.30025200  |
| C | 5.29858700  | 1.29466500  | 0.46739600  |
| C | -5.29730300 | 1.36943600  | -0.41023300 |
| C | -6.70849900 | 1.17242800  | -0.32607200 |
| C | -6.95049500 | -0.18980500 | 0.14118600  |
| C | -5.68689600 | -0.82380300 | 0.33753600  |
| C | -0.02081300 | -2.28254400 | 0.11576200  |
| C | -0.01617500 | -3.09385700 | 1.42841400  |
| C | -0.02567200 | -3.22759700 | -1.10456200 |
| H | 3.09053000  | -2.34440000 | 0.22904300  |
| H | -3.12102300 | -2.33437200 | 0.06768900  |
| H | -0.01534000 | -2.42970700 | 2.30566200  |
| H | 0.87635500  | -3.73825700 | 1.48212000  |
| H | -0.03075300 | -2.65935200 | -2.04678200 |
| H | -0.91639900 | -3.87628500 | -1.08800100 |
| H | -0.90659800 | -3.74058700 | 1.48597300  |
| H | 0.86672700  | -3.87435800 | -1.09536100 |
| C | 4.85173800  | 2.51175500  | 1.01594400  |
| C | 5.77940200  | 3.48884800  | 1.36104600  |
| C | 7.19086000  | 3.31860100  | 1.18196800  |
| C | 7.67173300  | 2.14388700  | 0.66208300  |
| C | 8.16851600  | -0.83300200 | -0.59699200 |
| C | 8.09285300  | -2.09133300 | -1.13759300 |
| C | 6.81123900  | -2.70318700 | -1.33645400 |
| C | 5.61872500  | -2.08537900 | -0.98185600 |
| C | -7.60158200 | 2.18816300  | -0.66552900 |
| C | -7.10120000 | 3.42157100  | -1.09715700 |
| C | -5.71710300 | 3.62396600  | -1.19586400 |
| C | -4.81413400 | 2.61032000  | -0.86192100 |
| C | -5.66326900 | -2.12731000 | 0.86353000  |
| C | -6.86499500 | -2.78810700 | 1.13509600  |
| C | -8.10039800 | -2.16620900 | 0.90427600  |
| C | -8.14483200 | -0.85634500 | 0.41498400  |
| H | 3.79154300  | 2.69559600  | 1.18679600  |
| H | 5.41883300  | 4.42691400  | 1.79047900  |
| H | 7.86841100  | 4.12506300  | 1.46560200  |
| H | 8.74356500  | 1.98688800  | 0.52431700  |
| H | 9.13234600  | -0.34079800 | -0.45134400 |
| H | 8.99492500  | -2.63174400 | -1.42773100 |
| H | 6.77503300  | -3.69685100 | -1.79019900 |
| H | 4.67367800  | -2.59015900 | -1.17622000 |
| H | -8.67972500 | 2.02394300  | -0.59874700 |
| H | -7.78968900 | 4.22664000  | -1.36322600 |
| H | -5.33429400 | 4.58645300  | -1.54266500 |
| H | -3.74742600 | 2.80168800  | -0.97172200 |
| H | -4.72596800 | -2.62953500 | 1.09733600  |
| H | -6.83717400 | -3.80163000 | 1.54186100  |
| H | -9.02829700 | -2.69980200 | 1.12139900  |
| H | -9.10510200 | -0.35912500 | 0.25845200  |

**Table S16:** Coordinates of the optimized minimum in the  $T_1$  state of QP1 at the B3LYP/cc-pVDZ level.

|   |             |             |             |
|---|-------------|-------------|-------------|
| C | 3.22430700  | 0.15176600  | -0.03896800 |
| S | 2.01374100  | -1.16605800 | -0.02665700 |
| C | 0.71936400  | -0.01758400 | -0.00493000 |
| C | 1.17391900  | 1.30008500  | -0.00549300 |
| C | 2.57684100  | 1.39730600  | -0.02204200 |
| C | -0.71936600 | -0.01759100 | 0.00464000  |
| S | -2.01373200 | -1.16607800 | 0.02627900  |
| C | -3.22430700 | 0.15173600  | 0.03881300  |
| C | -2.57685500 | 1.39728200  | 0.02182700  |
| C | -1.17393300 | 1.30007400  | 0.00522900  |
| C | 4.62755000  | -0.12027300 | -0.04452500 |
| C | -4.62754800 | -0.12031100 | 0.04452000  |
| C | 5.66369500  | 0.76329100  | 0.48383200  |
| C | 6.93828800  | 0.15621800  | 0.26505800  |
| C | 6.71659600  | -1.12824600 | -0.40123800 |
| C | 5.30831000  | -1.29430200 | -0.57996800 |
| C | -5.30824800 | -1.29436000 | 0.57999400  |
| C | -6.71655400 | -1.12830200 | 0.40141600  |
| C | -6.93831900 | 0.15618700  | -0.26480700 |
| C | -5.66375000 | 0.76327300  | -0.48368900 |
| C | -0.00001100 | 2.28216700  | -0.00014400 |
| C | -0.00535000 | 3.16206100  | -1.26851600 |
| C | 0.00531900  | 3.16208300  | 1.26821200  |
| H | 3.13045400  | 2.33238200  | -0.07924000 |
| H | -3.13047400 | 2.33235200  | 0.07906700  |
| H | -0.01125600 | 2.54581700  | -2.18007500 |
| H | 0.88651900  | 3.80887000  | -1.29446200 |
| H | 0.01123200  | 2.54585500  | 2.17978200  |
| H | -0.88655600 | 3.80888400  | 1.29414600  |
| H | -0.89539000 | 3.81174400  | -1.28421100 |
| H | 0.89535300  | 3.81177400  | 1.28389500  |
| C | 4.83011400  | -2.44199300 | -1.23627600 |
| C | 5.73866700  | -3.41097200 | -1.67247200 |
| C | 7.11745400  | -3.24676700 | -1.47630600 |
| C | 7.61272200  | -2.09751100 | -0.84417400 |
| C | 8.10904800  | 0.78012900  | 0.68883100  |
| C | 8.02472600  | 2.01503900  | 1.34711500  |
| C | 6.77628800  | 2.60473700  | 1.59284900  |
| C | 5.59473600  | 1.98593900  | 1.17328000  |
| C | -7.61263100 | -2.09758600 | 0.84440900  |
| C | -7.11729400 | -3.24686400 | 1.47644600  |
| C | -5.73848700 | -3.41107300 | 1.67246400  |
| C | -4.82998200 | -2.44207400 | 1.23621000  |
| C | -5.59486300 | 1.98595100  | -1.17308900 |
| C | -6.77646000 | 2.60476400  | -1.59251100 |
| C | -8.02487200 | 2.01505200  | -1.34667400 |
| C | -8.10912400 | 0.78011400  | -0.68843200 |
| H | 3.76531800  | -2.58314400 | -1.42334800 |
| H | 5.36721900  | -4.30452300 | -2.17875400 |
| H | 7.81060300  | -4.01501600 | -1.82577800 |
| H | 8.68857300  | -1.96598100 | -0.70703100 |
| H | 9.08200100  | 0.31278500  | 0.51988000  |
| H | 8.93623900  | 2.51428700  | 1.68275900  |
| H | 6.72384200  | 3.55605900  | 2.12688500  |
| H | 4.63489200  | 2.44561600  | 1.40871000  |
| H | -8.68849700 | -1.96605400 | 0.70738300  |
| H | -7.81040500 | -4.01512800 | 1.82596200  |
| H | -5.36698400 | -4.30464200 | 2.17867300  |
| H | -3.76516600 | -2.58323100 | 1.42316700  |
| H | -4.63504400 | 2.44564100  | -1.40859600 |
| H | -6.72407200 | 3.55611000  | -2.12651000 |
| H | -8.93642000 | 2.51431200  | -1.68220200 |
| H | -9.08205900 | 0.31276100  | -0.51940000 |

**Table S17:** Coordinates of the optimized minimum in the  $T_2$  state of QP1 at the B3LYP/cc-pVDZ level.

|   |             |             |             |
|---|-------------|-------------|-------------|
| C | -3.24155700 | -0.13634200 | -0.00918800 |
| S | -2.01602900 | 1.18010000  | -0.07202700 |
| C | -0.71965400 | 0.02931100  | 0.00530600  |
| C | -1.18965500 | -1.29342100 | 0.07619400  |
| C | -2.57797000 | -1.38957700 | 0.06949700  |
| C | 0.70209100  | 0.01856200  | -0.00218800 |
| S | 2.01458200  | 1.15519000  | -0.05410300 |
| C | 3.21731200  | -0.16736100 | 0.05442700  |
| C | 2.55876900  | -1.40531000 | 0.10390400  |
| C | 1.15997400  | -1.30261700 | 0.07068100  |
| C | -4.62650300 | 0.12920000  | -0.02880300 |
| C | 4.62659100  | 0.10151300  | 0.04207600  |
| C | -5.68617400 | -0.80383800 | 0.37543200  |
| C | -6.95202700 | -0.17915000 | 0.16180600  |
| C | -6.71303100 | 1.16146100  | -0.36711900 |
| C | -5.30178100 | 1.35261800  | -0.47013100 |
| C | 5.31123300  | 1.26576800  | 0.52291700  |
| C | 6.76447300  | 1.09833000  | 0.32659400  |
| C | 6.96947100  | -0.14838000 | -0.26702900 |
| C | 5.64656800  | -0.77328500 | -0.45748800 |
| C | -0.01815200 | -2.27805200 | 0.12481800  |
| C | -0.02496500 | -3.22235200 | -1.09598600 |
| C | -0.01947500 | -3.09087800 | 1.43671400  |
| H | -3.12584900 | -2.32808700 | 0.05754600  |
| H | 3.10187700  | -2.34173100 | 0.22158000  |
| H | -0.02425700 | -2.65333100 | -2.03779000 |
| H | -0.91954000 | -3.86587200 | -1.08274400 |
| H | -0.01710600 | -2.42739600 | 2.31449900  |
| H | 0.86962700  | -3.74011700 | 1.49165800  |
| H | 0.86312700  | -3.87524300 | -1.08503400 |
| H | -0.91317500 | -3.73332600 | 1.49237200  |
| C | -4.81851100 | 2.56936200  | -0.98320100 |
| C | -5.72206400 | 3.56845600  | -1.35711600 |
| C | -7.10585500 | 3.37399300  | -1.23814300 |
| C | -7.60617400 | 2.16287800  | -0.74649000 |
| C | -8.14261600 | -0.83502400 | 0.47449100  |
| C | -8.09114300 | -2.12297300 | 1.01922700  |
| C | -6.85297400 | -2.73374300 | 1.26545200  |
| C | -5.65446600 | -2.08397300 | 0.95555400  |
| C | 7.68282100  | 2.11672400  | 0.73035600  |
| C | 7.19885900  | 3.25718700  | 1.31617200  |
| C | 5.78469400  | 3.41054000  | 1.52659800  |
| C | 4.86139300  | 2.44998800  | 1.14505900  |
| C | 5.59476100  | -2.02543500 | -1.10667300 |
| C | 6.77377100  | -2.63287800 | -1.50764600 |
| C | 8.06583200  | -2.04093400 | -1.28943100 |
| C | 8.16279600  | -0.81402800 | -0.68589100 |
| H | -3.75136200 | 2.74900200  | -1.11015600 |
| H | -5.34057100 | 4.51286800  | -1.75191600 |
| H | -7.79471000 | 4.16762000  | -1.53592300 |
| H | -8.68428400 | 2.00488700  | -0.66497300 |
| H | -9.10541200 | -0.34682500 | 0.30526000  |
| H | -9.01635400 | -2.64789400 | 1.26702200  |
| H | -6.82095100 | -3.72927800 | 1.71427900  |
| H | -4.71210300 | -2.57248000 | 1.19933100  |
| H | 8.75427100  | 1.97750600  | 0.57206600  |
| H | 7.87397900  | 4.05339200  | 1.63308400  |
| H | 5.42736900  | 4.32184300  | 2.01238100  |
| H | 3.80158800  | 2.61203500  | 1.33993100  |
| H | 4.63972600  | -2.50599400 | -1.31534100 |
| H | 6.72432600  | -3.59883100 | -2.01639500 |
| H | 8.95858500  | -2.57433500 | -1.61904200 |
| H | 9.13437300  | -0.34111500 | -0.52812600 |



**Table S18:** Coordinates of the optimized minimum in the  $S_0$  state of QP2 at the B3LYP/cc-pVDZ level.

|    |             |             |             |
|----|-------------|-------------|-------------|
| C  | 3.23765000  | 0.17457300  | 0.02386000  |
| S  | 1.84925900  | -0.97100000 | 0.00710200  |
| C  | 0.69292000  | 0.34487400  | 0.00572900  |
| C  | 1.34889200  | 1.63162800  | 0.00985000  |
| C  | 2.71344200  | 1.52275000  | 0.02137500  |
| C  | -0.69292500 | 0.34487800  | -0.00573900 |
| S  | -1.84927300 | -0.97098800 | -0.00710800 |
| C  | -3.23765700 | 0.17459200  | -0.02387100 |
| C  | -2.71344000 | 1.52276700  | -0.02138300 |
| C  | -1.34889000 | 1.63163700  | -0.00986100 |
| C  | 4.55901300  | -0.23860500 | 0.02381700  |
| C  | -4.55901900 | -0.23858900 | -0.02382200 |
| C  | 5.75556500  | 0.62149900  | 0.18978300  |
| C  | 6.91768800  | -0.18662300 | 0.03678000  |
| C  | 6.49443500  | -1.56653500 | -0.19801300 |
| C  | 5.07209800  | -1.60741200 | -0.18433800 |
| C  | -5.07208500 | -1.60740200 | 0.18433400  |
| C  | -6.49442200 | -1.56654600 | 0.19802200  |
| C  | -6.91769600 | -0.18663900 | -0.03676800 |
| C  | -5.75558500 | 0.62150000  | -0.18978300 |
| Si | 0.00000500  | 2.97559100  | -0.00000500 |
| C  | 0.00780800  | 4.03718500  | -1.56104000 |
| C  | -0.00778900 | 4.03718200  | 1.56103300  |
| H  | 3.37907300  | 2.37975500  | -0.01807100 |
| H  | -3.37906500 | 2.37977700  | 0.01806600  |
| H  | 0.01174100  | 3.40839700  | -2.46501100 |
| H  | 0.89989300  | 4.68510600  | -1.58686200 |
| H  | -0.01173800 | 3.40839000  | 2.46500300  |
| H  | -0.89986400 | 4.68511700  | 1.58685200  |
| H  | -0.88296000 | 4.68655000  | -1.59518300 |
| H  | 0.88298900  | 4.68653200  | 1.59518400  |
| C  | 4.42870500  | -2.83801000 | -0.38812500 |
| C  | 5.19325100  | -3.99220000 | -0.59209600 |
| C  | 6.59274400  | -3.93872300 | -0.60135300 |
| C  | 7.25060300  | -2.71963000 | -0.40577800 |
| C  | 8.19929300  | 0.35401400  | 0.14514800  |
| C  | 8.34373500  | 1.71620000  | 0.42511200  |
| C  | 7.20962400  | 2.51628700  | 0.61247800  |
| C  | 5.92219100  | 1.97929800  | 0.50390300  |
| C  | -7.25057100 | -2.71965100 | 0.40579100  |
| C  | -6.59269300 | -3.93873500 | 0.60135900  |
| C  | -5.19319900 | -3.99219200 | 0.59209000  |
| C  | -4.42867200 | -2.83799100 | 0.38811400  |
| C  | -5.92223700 | 1.97929600  | -0.50390500 |
| C  | -7.20967900 | 2.51626500  | -0.61246800 |
| C  | -8.34377700 | 1.71616100  | -0.42508900 |
| C  | -8.19931000 | 0.35397800  | -0.14512500 |
| H  | 3.34357400  | -2.92457500 | -0.39583000 |
| H  | 4.68614000  | -4.94700400 | -0.74658500 |
| H  | 7.17146500  | -4.85078900 | -0.76274800 |
| H  | 8.34195400  | -2.67391000 | -0.41658100 |
| H  | 9.08008700  | -0.28030300 | 0.02220400  |
| H  | 9.34059500  | 2.15355900  | 0.51265200  |
| H  | 7.32703500  | 3.57465900  | 0.85553200  |
| H  | 5.07364300  | 2.63214600  | 0.69801300  |
| H  | -8.34192300 | -2.67394800 | 0.41660300  |
| H  | -7.17139900 | -4.85081000 | 0.76275900  |
| H  | -4.68607200 | -4.94698800 | 0.74657400  |
| H  | -3.34353900 | -2.92453900 | 0.39580900  |
| H  | -5.07370400 | 2.63215900  | -0.69802500 |
| H  | -7.32710900 | 3.57463400  | -0.85552400 |
| H  | -9.34064400 | 2.15350400  | -0.51262200 |
| H  | -9.08009400 | -0.28035300 | -0.02217200 |

**Table S19:** Coordinates of the optimized minimum in the  $S_1^{\text{DE}}$  state of QP2 at the B3LYP/cc-pVDZ level.

|    |             |             |             |
|----|-------------|-------------|-------------|
| C  | 3.23275900  | 0.20594800  | -0.05731300 |
| S  | 1.84340400  | -0.92688600 | -0.03377400 |
| C  | 0.70966200  | 0.39720000  | -0.00884600 |
| C  | 1.35442000  | 1.66301100  | -0.01842200 |
| C  | 2.74324000  | 1.53994700  | -0.04505500 |
| C  | -0.70966200 | 0.39720100  | 0.00886300  |
| S  | -1.84340600 | -0.92688300 | 0.03380400  |
| C  | -3.23276000 | 0.20595300  | 0.05732000  |
| C  | -2.74323900 | 1.53995200  | 0.04506700  |
| C  | -1.35441900 | 1.66301300  | 0.01843600  |
| C  | 4.56988700  | -0.24611900 | -0.06732400 |
| C  | -4.56988900 | -0.24611400 | 0.06732100  |
| C  | 5.73506700  | 0.52964600  | 0.35721000  |
| C  | 6.90927900  | -0.26303600 | 0.16400000  |
| C  | 6.49576900  | -1.55690000 | -0.37586300 |
| C  | 5.07177600  | -1.54553900 | -0.50621500 |
| C  | -5.07177800 | -1.54553300 | 0.50621300  |
| C  | -6.49577100 | -1.55689600 | 0.37585400  |
| C  | -6.90927900 | -0.26303600 | -0.16401800 |
| C  | -5.73506600 | 0.52964700  | -0.35722500 |
| Si | 0.00000200  | 3.00183700  | 0.00000900  |
| C  | -0.02446100 | 4.06733200  | -1.55948500 |
| C  | 0.02446700  | 4.06732300  | 1.55950900  |
| H  | 3.42370100  | 2.38526800  | -0.12489700 |
| H  | -3.42369800 | 2.38527400  | 0.12490600  |
| H  | -0.03925200 | 3.43999800  | -2.46439900 |
| H  | 0.86702300  | 4.71531400  | -1.60290900 |
| H  | 0.03924400  | 3.43998300  | 2.46441900  |
| H  | -0.86700900 | 4.71531700  | 1.60293200  |
| H  | -0.91576900 | 4.71687400  | -1.57421500 |
| H  | 0.91578400  | 4.71685300  | 1.57425000  |
| C  | 4.42621400  | -2.67550300 | -1.04177600 |
| C  | 5.18322500  | -3.79362400 | -1.40414900 |
| C  | 6.57763100  | -3.79988800 | -1.25522000 |
| C  | 7.24026100  | -2.67422300 | -0.74527800 |
| C  | 8.16855500  | 0.22764400  | 0.50107400  |
| C  | 8.27801500  | 1.51303100  | 1.04977000  |
| C  | 7.12976500  | 2.28611300  | 1.27573000  |
| C  | 5.86106200  | 1.80328900  | 0.94198000  |
| C  | -7.24026200 | -2.67421900 | 0.74527000  |
| C  | -6.57763300 | -3.79988100 | 1.25522000  |
| C  | -5.18322800 | -3.79361500 | 1.40415500  |
| C  | -4.42621700 | -2.67549400 | 1.04178200  |
| C  | -5.86106100 | 1.80328600  | -0.94200500 |
| C  | -7.12976300 | 2.28610600  | -1.27576500 |
| C  | -8.27801200 | 1.51302400  | -1.04980600 |
| C  | -8.16855400 | 0.22764000  | -0.50110100 |
| H  | 3.34693100  | -2.69290200 | -1.19496200 |
| H  | 4.67876700  | -4.67082500 | -1.81540700 |
| H  | 7.15132400  | -4.68278300 | -1.54576700 |
| H  | 8.32819100  | -2.67638600 | -0.64406200 |
| H  | 9.06212700  | -0.38253300 | 0.34922900  |
| H  | 9.26069400  | 1.90835300  | 1.31637300  |
| H  | 7.22473600  | 3.27620300  | 1.72739900  |
| H  | 4.98495100  | 2.41065700  | 1.16742700  |
| H  | -8.32819300 | -2.67638400 | 0.64404800  |
| H  | -7.15132700 | -4.68277500 | 1.54576700  |
| H  | -4.67877200 | -4.67081300 | 1.81542000  |
| H  | -3.34693500 | -2.69289100 | 1.19497400  |
| H  | -4.98495000 | 2.41065400  | -1.16745300 |
| H  | -7.22473300 | 3.27619300  | -1.72744100 |
| H  | -9.26069100 | 1.90834200  | -1.31641600 |
| H  | -9.06212600 | -0.38253700 | -0.34925800 |

**Table S20:** Coordinates of the optimized minimum in the  $S_1^{\text{LE}}$  state of QP2 at the B3LYP/cc-pVDZ level.

|   |             |             |             |
|---|-------------|-------------|-------------|
| C | -3.25521000 | 0.18804100  | 0.01722100  |
| S | -1.85233500 | -0.93193100 | 0.06313400  |
| C | -0.72304600 | 0.39155800  | -0.00585600 |
| C | -1.37891900 | 1.65110800  | -0.05715800 |
| C | -2.76142100 | 1.52479800  | -0.04569000 |
| C | 0.69660100  | 0.40761700  | -0.00559700 |
| S | 1.85883200  | -0.90147800 | 0.04186000  |
| C | 3.22524200  | 0.23487100  | -0.06004100 |
| C | 2.73136600  | 1.55307900  | -0.10162600 |
| C | 1.33204900  | 1.66491500  | -0.06855100 |
| C | -4.58341200 | -0.26075000 | 0.04296000  |
| C | 4.58352200  | -0.21837800 | -0.05810000 |
| C | -5.77410300 | 0.54026700  | -0.28104500 |
| C | -6.93587700 | -0.26278400 | -0.07408900 |
| C | -6.50177500 | -1.58653700 | 0.36466800  |
| C | -5.07540600 | -1.59031600 | 0.41992600  |
| C | 5.09718400  | -1.49332300 | -0.48920900 |
| C | 6.55955600  | -1.50914400 | -0.32547600 |
| C | 6.94349600  | -0.27531400 | 0.20383500  |
| C | 5.72559600  | 0.53598000  | 0.38059500  |
| S | -0.03002700 | 2.99137700  | -0.11354300 |
| C | -0.02811700 | 4.11840400  | 1.40405100  |
| C | -0.04514300 | 4.00349800  | -1.70982200 |
| H | -3.43950900 | 2.37397800  | -0.02275000 |
| H | 3.40023600  | 2.40480900  | -0.21308500 |
| H | -0.02015700 | 3.52590800  | 2.33232000  |
| H | -0.92372400 | 4.76208100  | 1.41346600  |
| H | -0.04800900 | 3.34412100  | -2.59187000 |
| H | 0.84304500  | 4.65485300  | -1.76844000 |
| H | 0.85931700  | 4.77343000  | 1.40396800  |
| H | -0.93997100 | 4.64665900  | -1.75655100 |
| C | -4.41774800 | -2.76097300 | 0.83722600  |
| C | -5.16701500 | -3.89388700 | 1.16838300  |
| C | -6.56748900 | -3.88049000 | 1.09964200  |
| C | -7.24065500 | -2.72007900 | 0.70082800  |
| C | -8.21466700 | 0.23881200  | -0.31560500 |
| C | -8.35794900 | 1.54967400  | -0.78316000 |
| C | -7.22326500 | 2.33717600  | -1.02486700 |
| C | -5.93780400 | 1.84221600  | -0.78561500 |
| C | 7.33395000  | -2.65336800 | -0.68912600 |
| C | 6.69847300  | -3.75322900 | -1.20716200 |
| C | 5.27668000  | -3.73279000 | -1.38197400 |
| C | 4.48949400  | -2.63961600 | -1.03490900 |
| C | 5.87079600  | 1.81210200  | 0.96209500  |
| C | 7.13598500  | 2.26352900  | 1.31445500  |
| C | 8.32346900  | 1.48524400  | 1.11195300  |
| C | 8.22838000  | 0.22893600  | 0.56982400  |
| H | -3.33258400 | -2.80643000 | 0.92055500  |
| H | -4.64959300 | -4.80104100 | 1.48856100  |
| H | -7.13414500 | -4.77638400 | 1.36278100  |
| H | -8.33226500 | -2.70416500 | 0.65674600  |
| H | -9.09534300 | -0.38664100 | -0.15114500 |
| H | -9.35376900 | 1.95506000  | -0.97518700 |
| H | -7.34134000 | 3.35073800  | -1.41498100 |
| H | -5.08180500 | 2.47025100  | -1.02705000 |
| H | 8.41750800  | -2.64158900 | -0.55395700 |
| H | 7.26103700  | -4.64334900 | -1.49200900 |
| H | 4.79211600  | -4.61426900 | -1.80926500 |
| H | 3.41360300  | -2.68002200 | -1.20181200 |
| H | 5.00261300  | 2.43889500  | 1.15943200  |
| H | 7.23464300  | 3.25238700  | 1.76942800  |
| H | 9.29056500  | 1.89911000  | 1.40085000  |
| H | 9.11703100  | -0.38819300 | 0.42177800  |

**Table S21:** Coordinates of the optimized minimum in the  $S_2$  state of QP2 at the B3LYP/cc-pVDZ level.

|    |             |             |             |
|----|-------------|-------------|-------------|
| C  | -3.25521400 | -0.18811900 | -0.01767700 |
| S  | -1.85235200 | 0.93185900  | -0.06345300 |
| C  | -0.72308100 | -0.39167000 | 0.00563000  |
| C  | -1.37896300 | -1.65120900 | 0.05684400  |
| C  | -2.76145700 | -1.52490900 | 0.04522800  |
| C  | 0.69657600  | -0.40766100 | 0.00545600  |
| S  | 1.85878700  | 0.90145300  | -0.04211800 |
| C  | 3.22521300  | -0.23487800 | 0.06008900  |
| C  | 2.73135900  | -1.55308700 | 0.10171700  |
| C  | 1.33203400  | -1.66493500 | 0.06855700  |
| C  | -4.58339300 | 0.26065300  | -0.04324600 |
| C  | 4.58346200  | 0.21840200  | 0.05828600  |
| C  | -5.77404900 | -0.54026600 | 0.28120300  |
| C  | -6.93580100 | 0.26289700  | 0.07458700  |
| C  | -6.50173100 | 1.58656500  | -0.36446200 |
| C  | -5.07539600 | 1.59019900  | -0.42020400 |
| C  | 5.09710600  | 1.49337500  | 0.48944800  |
| C  | 6.55942700  | 1.50920500  | 0.32574000  |
| C  | 6.94346700  | 0.27543800  | -0.20366800 |
| C  | 5.72556100  | -0.53589100 | -0.38040000 |
| Si | -0.03000500 | -2.99143700 | 0.11325400  |
| C  | -0.02780700 | -4.11795600 | -1.40474700 |
| C  | -0.04532900 | -4.00415000 | 1.70914400  |
| H  | -3.43952200 | -2.37411600 | 0.02213800  |
| H  | 3.40025600  | -2.40477600 | 0.21337500  |
| H  | -0.01997100 | -3.52511200 | -2.33279600 |
| H  | -0.92322300 | -4.76189000 | -1.41442300 |
| H  | -0.04910700 | -3.34514000 | 2.59146500  |
| H  | 0.84325100  | -4.65494900 | 1.76800200  |
| H  | 0.85982600  | -4.77272000 | -1.40489500 |
| H  | -0.93975900 | -4.64791800 | 1.75510800  |
| C  | -4.41774300 | 2.76065200  | -0.83808800 |
| C  | -5.16697900 | 3.89355600  | -1.16929100 |
| C  | -6.56744700 | 3.88034300  | -1.10002600 |
| C  | -7.24060100 | 2.72011300  | -0.70066900 |
| C  | -8.21455600 | -0.23849300 | 0.31674800  |
| C  | -8.35782600 | -1.54928900 | 0.78449900  |
| C  | -7.22313000 | -2.33694000 | 1.02572900  |
| C  | -5.93771700 | -1.84217300 | 0.78588000  |
| C  | 7.33384700  | 2.65341300  | 0.68951000  |
| C  | 6.69832000  | 3.75321100  | 1.20764900  |
| C  | 5.27654000  | 3.73273900  | 1.38241300  |
| C  | 4.48934900  | 2.63958200  | 1.03520000  |
| C  | 5.87082300  | -1.81202000 | -0.96192400 |
| C  | 7.13603700  | -2.26336700 | -1.31425700 |
| C  | 8.32351500  | -1.48503800 | -1.11179600 |
| C  | 8.22838000  | -0.22872100 | -0.56967500 |
| H  | -3.33259100 | 2.80589200  | -0.92186900 |
| H  | -4.64956100 | 4.80053600  | -1.48996600 |
| H  | -7.13410700 | 4.77621400  | -1.36322900 |
| H  | -8.33219800 | 2.70432700  | -0.65623000 |
| H  | -9.09521000 | 0.38708200  | 0.15263900  |
| H  | -9.35361900 | -1.95451400 | 0.97698900  |
| H  | -7.34115400 | -3.35047300 | 1.41593700  |
| H  | -5.08168300 | -2.47035800 | 1.02685400  |
| H  | 8.41739600  | 2.64174500  | 0.55433300  |
| H  | 7.26090200  | 4.64329100  | 1.49258300  |
| H  | 4.79189400  | 4.61414000  | 1.80978000  |
| H  | 3.41345800  | 2.68003300  | 1.20204700  |
| H  | 5.00267400  | -2.43886300 | -1.15925200 |
| H  | 7.23473600  | -3.25225000 | -1.76918300 |
| H  | 9.29061400  | -1.89887900 | -1.40070400 |
| H  | 9.11702700  | 0.38841700  | -0.42168000 |

**Table S22:** Coordinates of the optimized minimum in the  $T_1$  state of QP2 at the B3LYP/cc-pVDZ level.

|    |             |             |             |
|----|-------------|-------------|-------------|
| C  | -3.23473500 | 0.21066700  | 0.05766700  |
| S  | -1.85292200 | -0.91378100 | 0.03742900  |
| C  | -0.72415400 | 0.40728600  | 0.01108700  |
| C  | -1.35548300 | 1.65625000  | 0.01707000  |
| C  | -2.76135700 | 1.53073300  | 0.04079600  |
| C  | 0.72415700  | 0.40728000  | -0.01091000 |
| S  | 1.85291700  | -0.91379700 | -0.03714100 |
| C  | 3.23473500  | 0.21064100  | -0.05756700 |
| C  | 2.76136900  | 1.53071000  | -0.04067300 |
| C  | 1.35549600  | 1.65623900  | -0.01692500 |
| C  | -4.58827800 | -0.25055200 | 0.07382900  |
| C  | 4.58827500  | -0.25058500 | -0.07382600 |
| C  | -5.74037600 | 0.48574600  | -0.43995100 |
| C  | -6.91841600 | -0.28904100 | -0.21007300 |
| C  | -6.51713600 | -1.53382700 | 0.44787100  |
| C  | -5.09734600 | -1.50817000 | 0.60972200  |
| C  | 5.09729900  | -1.50822200 | -0.60971500 |
| C  | 6.51710200  | -1.53387500 | -0.44797100 |
| C  | 6.91843500  | -0.28906400 | 0.20989500  |
| C  | 5.74041300  | 0.48573300  | 0.43983100  |
| Si | 0.00001200  | 2.99179700  | 0.00006900  |
| C  | 0.01944300  | 4.06019900  | 1.55850800  |
| C  | -0.01941100 | 4.06018500  | -1.55838000 |
| H  | -3.44418900 | 2.37647800  | 0.10267500  |
| H  | 3.44420700  | 2.37644900  | -0.10259300 |
| H  | 0.03249300  | 3.43412500  | 2.46438800  |
| H  | -0.87267000 | 4.70746700  | 1.59903300  |
| H  | -0.03246500 | 3.43410400  | -2.46425400 |
| H  | 0.87270700  | 4.70744700  | -1.59890900 |
| H  | 0.90976400  | 4.71101200  | 1.57493300  |
| H  | -0.90972700 | 4.71100300  | -1.57481000 |
| C  | -4.45970600 | -2.58362600 | 1.25243300  |
| C  | -5.22320400 | -3.66855800 | 1.69376200  |
| C  | -6.61390600 | -3.69149500 | 1.51525700  |
| C  | -7.26818900 | -2.61737600 | 0.89552900  |
| C  | -8.16760400 | 0.17168800  | -0.61836300 |
| C  | -8.25864600 | 1.40843800  | -1.27239100 |
| C  | -7.10443900 | 2.16239200  | -1.52922500 |
| C  | -5.84525400 | 1.70819700  | -1.12511400 |
| C  | 7.26812000  | -2.61744200 | -0.89564600 |
| C  | 6.61378800  | -3.69158200 | -1.51528400 |
| C  | 5.22307300  | -3.66865000 | -1.69368500 |
| C  | 4.45960900  | -2.58370000 | -1.25233900 |
| C  | 5.84534300  | 1.70821400  | 1.12493300  |
| C  | 7.10455900  | 2.16242500  | 1.52892900  |
| C  | 8.25874500  | 1.40845800  | 1.27204000  |
| C  | 8.16765300  | 0.17168100  | 0.61807100  |
| H  | -3.38296700 | -2.58084500 | 1.42395900  |
| H  | -4.72783400 | -4.50611000 | 2.18957900  |
| H  | -7.19222400 | -4.54807100 | 1.86830100  |
| H  | -8.35351700 | -2.63256400 | 0.77139500  |
| H  | -9.06637800 | -0.42350400 | -0.44076500 |
| H  | -9.23311400 | 1.78051500  | -1.59605000 |
| H  | -7.18733000 | 3.11344100  | -2.05989000 |
| H  | -4.95898900 | 2.29407000  | -1.36858000 |
| H  | 8.35345700  | -2.63262600 | -0.77159500 |
| H  | 7.19207800  | -4.54817200 | -1.86834100 |
| H  | 4.72766400  | -4.50622000 | -2.18943400 |
| H  | 3.38285800  | -2.58092500 | -1.42378400 |
| H  | 4.95909600  | 2.29409900  | 1.36843800  |
| H  | 7.18749100  | 3.11349700  | 2.05954700  |
| H  | 9.23323900  | 1.78054800  | 1.59561000  |
| H  | 9.06641300  | -0.42351800 | 0.44042800  |

**Table S23:** Coordinates of the optimized minimum in the  $T_2$  state of QP2 at the B3LYP/cc-pVDZ level.

|    |             |             |             |
|----|-------------|-------------|-------------|
| C  | 3.22118700  | 0.16373700  | -0.05571700 |
| S  | 1.86076500  | -1.01176600 | -0.03873300 |
| C  | 0.68875400  | 0.30600700  | -0.01419800 |
| C  | 1.34054100  | 1.61674300  | -0.02290000 |
| C  | 2.71759600  | 1.49327800  | -0.04099600 |
| C  | -0.68875400 | 0.30600700  | 0.01420100  |
| S  | -1.86076400 | -1.01176700 | 0.03873500  |
| C  | -3.22118700 | 0.16373600  | 0.05572000  |
| C  | -2.71759700 | 1.49327600  | 0.04099700  |
| C  | -1.34054200 | 1.61674200  | 0.02290200  |
| C  | 4.58091100  | -0.25663600 | -0.06738300 |
| C  | -4.58091100 | -0.25663700 | 0.06738400  |
| C  | 5.71540400  | 0.51623000  | 0.43321900  |
| C  | 6.91337900  | -0.23093900 | 0.20962700  |
| C  | 6.54289100  | -1.49461800 | -0.42818900 |
| C  | 5.12159000  | -1.50834500 | -0.58477400 |
| C  | -5.12159200 | -1.50834400 | 0.58477600  |
| C  | -6.54289200 | -1.49461700 | 0.42818700  |
| C  | -6.91337700 | -0.23093800 | -0.20963100 |
| C  | -5.71540200 | 0.51623000  | -0.43321900 |
| Si | -0.00000100 | 2.95928300  | 0.00000100  |
| C  | -0.02887500 | 4.04686100  | -1.54830500 |
| C  | 0.02887400  | 4.04685700  | 1.54831100  |
| H  | 3.39818900  | 2.34172500  | -0.09676900 |
| H  | -3.39819100 | 2.34172200  | 0.09676700  |
| H  | -0.04722500 | 3.43411100  | -2.46306500 |
| H  | 0.86266400  | 4.69579100  | -1.58530600 |
| H  | 0.04720900  | 3.43410300  | 2.46306800  |
| H  | -0.86265700 | 4.69579800  | 1.58530700  |
| H  | -0.91890000 | 4.69894900  | -1.55067300 |
| H  | 0.91890800  | 4.69893300  | 1.55068900  |
| C  | 4.51030400  | -2.61022900 | -1.21080600 |
| C  | 5.30071400  | -3.68085500 | -1.63822900 |
| C  | 6.69236600  | -3.66460300 | -1.46446800 |
| C  | 7.32034200  | -2.56416100 | -0.86253800 |
| C  | 8.15122000  | 0.26722100  | 0.60661100  |
| C  | 8.21317800  | 1.51420600  | 1.24560200  |
| C  | 7.04054100  | 2.24024300  | 1.49961000  |
| C  | 5.79227400  | 1.74863100  | 1.10644900  |
| C  | -7.32034600 | -2.56415900 | 0.86253400  |
| C  | -6.69237200 | -3.66460100 | 1.46446600  |
| C  | -5.30072000 | -3.68085400 | 1.63823200  |
| C  | -4.51030800 | -2.61022800 | 1.21081000  |
| C  | -5.79226800 | 1.74863100  | -1.10644900 |
| C  | -7.04053400 | 2.24024500  | -1.49961400 |
| C  | -8.21317200 | 1.51420800  | -1.24561000 |
| C  | -8.15121700 | 0.26722300  | -0.60661800 |
| H  | 3.43351800  | -2.63765800 | -1.37866200 |
| H  | 4.82592800  | -4.53831900 | -2.11983000 |
| H  | 7.29211700  | -4.51052100 | -1.80719400 |
| H  | 8.40609600  | -2.54926100 | -0.74217200 |
| H  | 9.06441800  | -0.30666300 | 0.43256000  |
| H  | 9.17901400  | 1.91517900  | 1.56033100  |
| H  | 7.10020900  | 3.19855900  | 2.02010000  |
| H  | 4.89362700  | 2.31475100  | 1.35058900  |
| H  | -8.40609900 | -2.54925800 | 0.74216500  |
| H  | -7.29212500 | -4.51051700 | 1.80719100  |
| H  | -4.82593700 | -4.53831700 | 2.11983500  |
| H  | -3.43352300 | -2.63765800 | 1.37866900  |
| H  | -4.89361900 | 2.31475000  | -1.35058600 |
| H  | -7.10019900 | 3.19856100  | -2.02010400 |
| H  | -9.17900700 | 1.91518300  | -1.56034100 |
| H  | -9.06441600 | -0.30666000 | -0.43257000 |

**Table S24:** Coordinates of the optimized minimum in the  $S_0$  state of QT1 at the B3LYP/cc-pVDZ level.

|   |             |             |             |
|---|-------------|-------------|-------------|
| C | -3.21247900 | -0.17663800 | -0.00004500 |
| S | -1.99744100 | 1.15675400  | -0.00009900 |
| C | -0.68935200 | 0.00214000  | -0.00006600 |
| C | -1.17280800 | -1.35373900 | -0.00006200 |
| C | -2.53341800 | -1.45265600 | -0.00006500 |
| C | 0.68935600  | 0.00214000  | -0.00005300 |
| S | 1.99744500  | 1.15675400  | 0.00000300  |
| C | 3.21248100  | -0.17664000 | 0.00000900  |
| C | 2.53342200  | -1.45265700 | -0.00002300 |
| C | 1.17281100  | -1.35374000 | -0.00005300 |
| C | -4.56747600 | 0.07163300  | -0.00001500 |
| C | 4.56747900  | 0.07163300  | 0.00010700  |
| C | -5.65442500 | -0.92921900 | 0.00000500  |
| C | -6.88001800 | -0.25196000 | 0.00003800  |
| C | -6.62908800 | 1.16587700  | 0.00004000  |
| C | -5.24534900 | 1.37741700  | 0.00002300  |
| C | 5.24534900  | 1.37741600  | -0.00003200 |
| C | 6.62908900  | 1.16587900  | -0.00008400 |
| C | 6.88002000  | -0.25195900 | -0.00000900 |
| C | 5.65442700  | -0.92921700 | 0.00008900  |
| C | 5.83251300  | -2.34723900 | 0.00019500  |
| C | 7.15666500  | -2.71019500 | 0.00015800  |
| S | 8.23499900  | -1.32821400 | 0.00015400  |
| S | 7.52385100  | 2.64582100  | -0.00016600 |
| C | 6.03117100  | 3.56755200  | -0.00012200 |
| C | 4.91504200  | 2.76839000  | -0.00003000 |
| S | -8.23499900 | -1.32821300 | -0.00005300 |
| C | -7.15666600 | -2.71019500 | -0.00010500 |
| C | -5.83251400 | -2.34724100 | -0.00007900 |
| C | -4.91504900 | 2.76839400  | 0.00010700  |
| C | -6.03117900 | 3.56755200  | 0.00018400  |
| S | -7.52385600 | 2.64581600  | 0.00014300  |
| C | 0.00000100  | -2.33635600 | -0.00004600 |
| C | -0.00000700 | -3.21488000 | -1.26899500 |
| C | 0.00000900  | -3.21482300 | 1.26894000  |
| H | -3.08665700 | -2.38814100 | -0.00003600 |
| H | 3.08666400  | -2.38814100 | 0.00000600  |
| H | 5.03718100  | -3.09089800 | 0.00024100  |
| H | 7.57639500  | -3.71345600 | 0.00007400  |
| H | 6.07775100  | 4.65410600  | -0.00011900 |
| H | 3.90742100  | 3.18136200  | 0.00009000  |
| H | -7.57640000 | -3.71345400 | -0.00013700 |
| H | -5.03718500 | -3.09090200 | -0.00010700 |
| H | -3.90743000 | 3.18137100  | 0.00010400  |
| H | -6.07776700 | 4.65410500  | 0.00023200  |
| H | -0.00000900 | -2.59905600 | -2.18071500 |
| H | -0.89150700 | -3.86188300 | -1.28906800 |
| H | -0.89148800 | -3.86182900 | 1.28905600  |
| H | 0.00001400  | -2.59896000 | 2.18063500  |
| H | 0.89148700  | -3.86189200 | -1.28907800 |
| H | 0.89151100  | -3.86182300 | 1.28904400  |

**Table S25:** Coordinates of the optimized minimum in the  $S_1$  state of QT1 at the B3LYP/cc-pVDZ level.

|   |             |             |             |
|---|-------------|-------------|-------------|
| C | -3.24241000 | -0.19925000 | 0.00178200  |
| S | -2.02002100 | 1.11486000  | -0.13549500 |
| C | -0.72415000 | -0.03268200 | -0.02514800 |
| C | -1.19854200 | -1.36072300 | 0.10951800  |
| C | -2.57791900 | -1.45598800 | 0.12467800  |
| C | 0.68691600  | -0.04287300 | -0.03327800 |
| S | 2.00785800  | 1.09241400  | -0.14713700 |
| C | 3.20094400  | -0.22186700 | 0.02019300  |
| C | 2.54762400  | -1.46235700 | 0.13547400  |
| C | 1.15106200  | -1.36033900 | 0.10217100  |
| C | -4.61068000 | 0.07238700  | -0.01839500 |
| C | 4.60378700  | 0.05862500  | 0.00448200  |
| C | -5.70122300 | -0.90655700 | 0.08056900  |
| C | -6.92619900 | -0.22052600 | 0.02108500  |
| C | -6.66027000 | 1.18336500  | -0.11472600 |
| C | -5.26830800 | 1.37417400  | -0.14003000 |
| C | 5.26497300  | 1.32030700  | 0.18556700  |
| C | 6.71707800  | 1.13522900  | 0.10509200  |
| C | 6.96015600  | -0.19168600 | -0.12017300 |
| C | 5.66719700  | -0.88264000 | -0.19002600 |
| C | 5.85172800  | -2.26162000 | -0.45770300 |
| C | 7.18082400  | -2.60850900 | -0.57351700 |
| S | 8.32023900  | -1.28269900 | -0.36852600 |
| S | 7.60076900  | 2.64244700  | 0.32984000  |
| C | 6.06522400  | 3.47688700  | 0.53141400  |
| C | 4.94537000  | 2.67711900  | 0.43386300  |
| S | -8.28885800 | -1.28413700 | 0.12860200  |
| C | -7.21812800 | -2.66948900 | 0.25495400  |
| C | -5.89232700 | -2.31770400 | 0.21510400  |
| C | -4.92242400 | 2.75662400  | -0.27325400 |
| C | -6.02618600 | 3.56807400  | -0.34485600 |
| S | -7.53415700 | 2.67147400  | -0.25184300 |
| C | -0.02250300 | -2.33636500 | 0.20456600  |
| C | -0.02420300 | -3.33750300 | -0.97010200 |
| C | -0.01757300 | -3.08443900 | 1.55437800  |
| H | -3.13148100 | -2.38635900 | 0.22257800  |
| H | 3.09265000  | -2.39243100 | 0.28330300  |
| H | 5.05332600  | -2.99090200 | -0.57997200 |
| H | 7.57371100  | -3.60353100 | -0.77896200 |
| H | 6.07773800  | 4.54975700  | 0.71962000  |
| H | 3.93829800  | 3.07466500  | 0.54740300  |
| H | -7.64509800 | -3.66504300 | 0.35142700  |
| H | -5.10161200 | -3.06359700 | 0.28117800  |
| H | -3.90934200 | 3.15421000  | -0.31621300 |
| H | -6.05744200 | 4.65027900  | -0.44799300 |
| H | -0.03073200 | -2.81424600 | -1.93798800 |
| H | -0.91304900 | -3.98717400 | -0.92302800 |
| H | -0.90679500 | -3.72936300 | 1.64205700  |
| H | -0.01849600 | -2.37948300 | 2.39912700  |
| H | 0.87000500  | -3.98057100 | -0.93064700 |
| H | 0.87600800  | -3.72398900 | 1.63897800  |



**Table S26:** Coordinates of the optimized minimum in the  $S_2$  state of QT1 at the B3LYP/cc-pVDZ level.

|   |             |             |             |
|---|-------------|-------------|-------------|
| C | -3.20094000 | -0.22188500 | 0.02020000  |
| S | -2.00785900 | 1.09245300  | -0.14660900 |
| C | -0.68691700 | -0.04286300 | -0.03309700 |
| C | -1.15105400 | -1.36037100 | 0.10188300  |
| C | -2.54761800 | -1.46240700 | 0.13508100  |
| C | 0.72415000  | -0.03267200 | -0.02503600 |
| S | 2.02001400  | 1.11492000  | -0.13489800 |
| C | 3.24240700  | -0.19923900 | 0.00183800  |
| C | 2.57792100  | -1.45602200 | 0.12430700  |
| C | 1.19854500  | -1.36075800 | 0.10916600  |
| C | -4.60378600 | 0.05861200  | 0.00451800  |
| C | 4.61067200  | 0.07240100  | -0.01830200 |
| C | -5.66718500 | -0.88255700 | -0.19046500 |
| C | -6.96014600 | -0.19161900 | -0.12036100 |
| C | -6.71707900 | 1.13518200  | 0.10551500  |
| C | -5.26497400 | 1.32021400  | 0.18615900  |
| C | 5.26829800  | 1.37412700  | -0.14059300 |
| C | 6.66026200  | 1.18333400  | -0.11516100 |
| C | 6.92619000  | -0.22048500 | 0.02139600  |
| C | 5.70121300  | -0.90648300 | 0.08124900  |
| C | 5.89231800  | -2.31751800 | 0.21695600  |
| C | 7.21811800  | -2.66925600 | 0.25722700  |
| S | 8.28884700  | -1.28399500 | 0.12988500  |
| S | 7.53415100  | 2.67134000  | -0.25334600 |
| C | 6.02618200  | 3.56787700  | -0.34698400 |
| C | 4.92241700  | 2.75648100  | -0.27482400 |
| S | -8.32022100 | -1.28252000 | -0.36927800 |
| C | -7.18080500 | -2.60824800 | -0.57481400 |
| C | -5.85171400 | -2.26141400 | -0.45879300 |
| C | -4.94537600 | 2.67690400  | 0.43513900  |
| C | -6.06522900 | 3.47663200  | 0.53302700  |
| S | -7.60076800 | 2.64230400  | 0.33093200  |
| C | 0.02251400  | -2.33643400 | 0.20391200  |
| C | 0.02416100  | -3.33714000 | -0.97112500 |
| C | 0.01763300  | -3.08499100 | 1.55345400  |
| H | -3.09266500 | -2.39251800 | 0.28256700  |
| H | 3.13148800  | -2.38644900 | 0.22165200  |
| H | 5.10160600  | -3.06335600 | 0.28368000  |
| H | 7.64508900  | -3.66473200 | 0.35449100  |
| H | 6.05744300  | 4.65001300  | -0.45083200 |
| H | 3.90933600  | 3.15403600  | -0.31809300 |
| H | -7.57370200 | -3.60316200 | -0.78076500 |
| H | -5.05331000 | -2.99064100 | -0.58135800 |
| H | -3.93830600 | 3.07437800  | 0.54893200  |
| H | -6.07777500 | 4.54940900  | 0.72176500  |
| H | 0.03066200  | -2.81352300 | -1.93881600 |
| H | -0.87005300 | -3.98021000 | -0.93187600 |
| H | -0.87595000 | -3.72456400 | 1.63786200  |
| H | 0.01859700  | -2.38033700 | 2.39845300  |
| H | 0.91300100  | -3.98684000 | -0.92432800 |
| H | 0.90685400  | -3.72995300 | 1.64086700  |

**Table S27:** Coordinates of the optimized minimum in the  $T_1$  state of QT1 at the B3LYP/cc-pVDZ level.

|   |             |             |             |
|---|-------------|-------------|-------------|
| C | -3.22117600 | -0.21027000 | 0.01458300  |
| S | -2.01324800 | 1.09893200  | -0.13008300 |
| C | -0.71924200 | -0.04478200 | -0.01086100 |
| C | -1.17405200 | -1.35643500 | 0.13004400  |
| C | -2.57506200 | -1.45332300 | 0.14402900  |
| C | 0.71924400  | -0.04477900 | -0.01085700 |
| S | 2.01324700  | 1.09893400  | -0.13012100 |
| C | 3.22117700  | -0.21026200 | 0.01457000  |
| C | 2.57506700  | -1.45331700 | 0.14402100  |
| C | 1.17405700  | -1.35643000 | 0.13005300  |
| C | -4.61320400 | 0.06900800  | -0.01164500 |
| C | 4.61320500  | 0.06901800  | -0.01164000 |
| C | -5.69486000 | -0.91575600 | -0.06016100 |
| C | -6.92298200 | -0.23161100 | -0.05907500 |
| C | -6.65853500 | 1.18210000  | -0.01504300 |
| C | -5.26533400 | 1.37344500  | 0.01160300  |
| C | 5.26534300  | 1.37344900  | 0.01162600  |
| C | 6.65854500  | 1.18209800  | -0.01501500 |
| C | 6.92298500  | -0.23161600 | -0.05905400 |
| C | 5.69485700  | -0.91574900 | -0.06016800 |
| C | 5.87698900  | -2.33270100 | -0.13825000 |
| C | 7.20052700  | -2.69020800 | -0.18322600 |
| S | 8.27692800  | -1.30275800 | -0.14078200 |
| S | 7.53032500  | 2.67289400  | 0.03229700  |
| C | 6.02201000  | 3.57472200  | 0.09055500  |
| C | 4.91855900  | 2.76139400  | 0.07639200  |
| S | -8.27694200 | -1.30273900 | -0.14067500 |
| C | -7.20055900 | -2.69020400 | -0.18306400 |
| C | -5.87701600 | -2.33271200 | -0.13812800 |
| C | -4.91854800 | 2.76139500  | 0.07629600  |
| C | -6.02199700 | 3.57472500  | 0.09039600  |
| S | -7.53031400 | 2.67289800  | 0.03216200  |
| C | 0.00000400  | -2.33252200 | 0.23713200  |
| C | 0.00001300  | -3.34487500 | -0.92822400 |
| C | -0.00000100 | -3.06841100 | 1.59414300  |
| H | -3.12819300 | -2.38117200 | 0.26858700  |
| H | 3.12821400  | -2.38115600 | 0.26859500  |
| H | 5.08073600  | -3.07470700 | -0.17247300 |
| H | 7.62485100  | -3.68983600 | -0.24106100 |
| H | 6.05539600  | 4.66093300  | 0.13197600  |
| H | 3.90541500  | 3.15922500  | 0.11439500  |
| H | -7.62489800 | -3.68982800 | -0.24085900 |
| H | -5.08078100 | -3.07474000 | -0.17232700 |
| H | -3.90540700 | 3.15923400  | 0.11429900  |
| H | -6.05538500 | 4.66093700  | 0.13177400  |
| H | 0.00001600  | -2.83154200 | -1.90143700 |
| H | -0.89094000 | -3.99148200 | -0.87842200 |
| H | -0.89091600 | -3.71046400 | 1.68572800  |
| H | -0.00000700 | -2.35638900 | 2.43296300  |
| H | 0.89096900  | -3.99147700 | -0.87841300 |
| H | 0.89091500  | -3.71046000 | 1.68573600  |

**Table S28:** Coordinates of the optimized minimum in the  $S_0$  state of QT2 at the B3LYP/cc-pVDZ level.

|    |             |             |             |
|----|-------------|-------------|-------------|
| C  | -3.22585900 | -0.24182400 | 0.00000900  |
| S  | -1.84890700 | 0.90748600  | -0.00004600 |
| C  | -0.69229800 | -0.41196000 | 0.00007900  |
| C  | -2.71369700 | -1.59246400 | 0.00011000  |
| C  | 0.69229200  | -0.41195100 | 0.00006100  |
| S  | 1.84888700  | 0.90750800  | -0.00000500 |
| C  | 3.22585000  | -0.24179100 | 0.00007300  |
| C  | 2.71370300  | -1.59243300 | 0.00005100  |
| C  | 1.34951200  | -1.70130200 | 0.00005200  |
| C  | -4.54043000 | 0.17481900  | -0.00002900 |
| C  | 4.54042400  | 0.17485400  | 0.00017900  |
| C  | -5.74618500 | -0.67922800 | -0.00011500 |
| C  | -6.87534700 | 0.14925100  | -0.00006500 |
| C  | -6.44520300 | 1.52351800  | 0.00002700  |
| C  | -5.04562800 | 1.55549100  | 0.00007200  |
| C  | 5.04565000  | 1.55551400  | -0.00025300 |
| C  | 6.44522700  | 1.52351500  | -0.00039600 |
| C  | 6.87534100  | 0.14923500  | 0.00004400  |
| C  | 5.74615600  | -0.67921400 | 0.00039800  |
| C  | 6.10451300  | -2.06282600 | 0.00054000  |
| C  | 7.46422600  | -2.25339100 | 0.00028700  |
| S  | 8.35681700  | -0.74470100 | -0.00024700 |
| S  | 7.14171700  | 3.10620700  | -0.00032300 |
| C  | 5.54252600  | 3.82839300  | -0.00016200 |
| C  | 4.53862500  | 2.89215800  | -0.00011800 |
| S  | -8.35685200 | -0.74463800 | -0.00042500 |
| C  | -7.46430700 | -2.25335300 | -0.00060000 |
| C  | -6.10458800 | -2.06283100 | -0.00043300 |
| C  | -4.53857900 | 2.89212700  | 0.00037300  |
| C  | -5.54246300 | 3.82837800  | 0.00054100  |
| S  | -7.14166800 | 3.10622000  | 0.00034500  |
| Si | 0.00001000  | -3.04532900 | 0.00014700  |
| H  | 3.39242400  | -2.44239200 | -0.00004000 |
| H  | 5.41059500  | -2.90190500 | 0.00102600  |
| H  | 8.00889100  | -3.19469400 | 0.00040100  |
| H  | 5.44916900  | 4.91193700  | -0.00025000 |
| H  | 3.48579900  | 3.17044800  | -0.00001600 |
| H  | -8.00900900 | -3.19463400 | -0.00077300 |
| H  | -5.41070400 | -2.90193600 | -0.00054000 |
| H  | -3.48574800 | 3.17040200  | 0.00043900  |
| H  | -5.44909400 | 4.91192100  | 0.00070500  |
| C  | -1.34950600 | -1.70131600 | 0.00015100  |
| H  | -3.39239400 | -2.44243900 | 0.00020500  |
| C  | -0.00002500 | -4.10522400 | -1.56164200 |
| H  | 0.00008900  | -3.47585300 | -2.46519900 |
| H  | -0.89147100 | -4.75380000 | -1.59207400 |
| C  | 0.00005900  | -4.10519300 | 1.56194600  |
| H  | -0.89125400 | -4.75395800 | 1.59225200  |
| H  | -0.00009600 | -3.47581900 | 2.46550100  |
| H  | 0.89153000  | -4.75373100 | 1.59239600  |
| H  | 0.89131000  | -4.75395900 | -1.59196300 |

**Table S29:** Coordinates of the optimized minimum in the  $S_1$  state of QT2 at the B3LYP/cc-pVDZ level.

|    |             |             |             |
|----|-------------|-------------|-------------|
| C  | -3.25163600 | -0.27363000 | 0.00121800  |
| S  | -1.85867200 | 0.84834500  | -0.08353900 |
| C  | -0.72725100 | -0.47389200 | 0.01146100  |
| C  | -2.76405200 | -1.60979800 | 0.09782400  |
| C  | 0.69124100  | -0.48987300 | 0.00832000  |
| S  | 1.85332800  | 0.82007300  | -0.08819600 |
| C  | 3.21447200  | -0.31106700 | 0.02700600  |
| C  | 2.73016300  | -1.62860700 | 0.11614400  |
| C  | 1.33000500  | -1.74309400 | 0.10381200  |
| C  | -4.57153100 | 0.18088000  | -0.02885400 |
| C  | 4.56763000  | 0.15444000  | 0.00537200  |
| C  | -5.78669800 | -0.64234300 | 0.02869200  |
| C  | -6.90555100 | 0.20603900  | -0.02823600 |
| C  | -6.44837800 | 1.56370600  | -0.12185800 |
| C  | -5.04317000 | 1.56229900  | -0.12332500 |
| C  | 5.05416300  | 1.49317400  | 0.18897000  |
| C  | 6.51724700  | 1.50623800  | 0.09989700  |
| C  | 6.93550100  | 0.22532300  | -0.13376600 |
| C  | 5.74692900  | -0.63376100 | -0.20017200 |
| C  | 6.11513000  | -1.97409600 | -0.47570700 |
| C  | 7.47797700  | -2.13752700 | -0.60040400 |
| S  | 8.42906200  | -0.67047600 | -0.39503600 |
| S  | 7.19056800  | 3.11820400  | 0.32624300  |
| C  | 5.55748100  | 3.73700800  | 0.53865500  |
| C  | 4.55545900  | 2.79341600  | 0.44372400  |
| S  | -8.40202200 | -0.66327000 | 0.03115000  |
| C  | -7.53275700 | -2.18495400 | 0.13354700  |
| C  | -6.17087300 | -2.01705700 | 0.12147900  |
| C  | -4.50855500 | 2.88675300  | -0.21430400 |
| C  | -5.48932400 | 3.84370600  | -0.27870600 |
| S  | -7.10737800 | 3.16042200  | -0.23031800 |
| Si | -0.03001100 | -3.06935900 | 0.20335000  |
| H  | 3.40380100  | -2.47666700 | 0.22732300  |
| H  | 5.42220400  | -2.80434500 | -0.59679400 |
| H  | 8.00061200  | -3.06942500 | -0.81266800 |
| H  | 5.42599800  | 4.80120900  | 0.73050900  |
| H  | 3.50441000  | 3.05084200  | 0.56276600  |
| H  | -8.09328100 | -3.11477100 | 0.19666100  |
| H  | -5.49024900 | -2.86528400 | 0.17767400  |
| H  | -3.44964700 | 3.14104700  | -0.23280000 |
| H  | -5.37070300 | 4.92222700  | -0.35285800 |
| C  | -1.38215000 | -1.73398300 | 0.10427500  |
| H  | -3.44884800 | -2.45243700 | 0.16293600  |
| C  | -0.03471500 | -4.24999600 | -1.27245600 |
| H  | -0.03361600 | -3.69147800 | -2.22156800 |
| H  | -0.92876500 | -4.89557600 | -1.25306300 |
| C  | -0.03457300 | -4.02029000 | 1.83646800  |
| H  | -0.92808800 | -4.66246400 | 1.91211600  |
| H  | -0.03401400 | -3.32817600 | 2.69303900  |
| H  | 0.85492300  | -4.66773700 | 1.91474300  |
| H  | 0.85414700  | -4.90278100 | -1.25417900 |

**Table S30:** Coordinates of the optimized minimum in the  $S_2$  state of QT2 at the B3LYP/cc-pVDZ level.

|    |             |             |             |
|----|-------------|-------------|-------------|
| C  | -3.21450400 | -0.31109400 | 0.02710200  |
| S  | -1.85336700 | 0.82010500  | -0.08785500 |
| C  | -0.69126100 | -0.48981700 | 0.00850600  |
| C  | -2.73016500 | -1.62863000 | 0.11606500  |
| C  | 0.72725800  | -0.47386200 | 0.01153000  |
| S  | 1.85868300  | 0.84839900  | -0.08306500 |
| C  | 3.25165300  | -0.27362900 | 0.00128100  |
| C  | 2.76404700  | -1.60980600 | 0.09752100  |
| C  | 1.38214100  | -1.73397900 | 0.10393800  |
| C  | -4.56764200 | 0.15444000  | 0.00549900  |
| C  | 4.57155100  | 0.18090000  | -0.02876700 |
| C  | -5.74694000 | -0.63372800 | -0.20017700 |
| C  | -6.93553000 | 0.22533000  | -0.13369400 |
| C  | -6.51728900 | 1.50621100  | 0.10020200  |
| C  | -5.05421300 | 1.49313100  | 0.18936500  |
| C  | 5.04320400  | 1.56227800  | -0.12370600 |
| C  | 6.44841700  | 1.56368600  | -0.12214100 |
| C  | 6.90558200  | 0.20605200  | -0.02797900 |
| C  | 5.78671300  | -0.64230000 | 0.02918400  |
| C  | 6.17085500  | -2.01696600 | 0.12279400  |
| C  | 7.53273300  | -2.18487500 | 0.13513700  |
| S  | 8.40203300  | -0.66324700 | 0.03215800  |
| S  | 7.10742900  | 3.16034400  | -0.23135800 |
| C  | 5.48937200  | 3.84360400  | -0.28031700 |
| C  | 4.50860200  | 2.88668800  | -0.21545000 |
| S  | -8.42904100 | -0.67044500 | -0.39528100 |
| C  | -7.47791400 | -2.13743900 | -0.60086500 |
| C  | -6.11506900 | -1.97400500 | -0.47604800 |
| C  | -4.55551900 | 2.79330600  | 0.44439700  |
| C  | -5.55756600 | 3.73688200  | 0.53946700  |
| S  | -7.19062500 | 3.11813900  | 0.32680100  |
| Si | 0.02999500  | -3.06937600 | 0.20275400  |
| H  | 3.44882600  | -2.45249600 | 0.16216400  |
| H  | 5.49019000  | -2.86512700 | 0.17944600  |
| H  | 8.09325000  | -3.11465900 | 0.19880200  |
| H  | 5.37076000  | 4.92208700  | -0.35502700 |
| H  | 3.44969400  | 3.14095800  | -0.23418400 |
| H  | -8.00049700 | -3.06930500 | -0.81339400 |
| H  | -5.42208700 | -2.80418100 | -0.59729700 |
| H  | -3.50447800 | 3.05070700  | 0.56355100  |
| H  | -5.42604400 | 4.80103900  | 0.73154100  |
| C  | -1.32999000 | -1.74306000 | 0.10379200  |
| H  | -3.40376600 | -2.47673000 | 0.22717500  |
| C  | 0.03440200  | -4.24940000 | -1.27355300 |
| H  | 0.03234800  | -3.69043900 | -2.22240300 |
| H  | -0.85407000 | -4.90271200 | -1.25499700 |
| C  | 0.03490000  | -4.02087000 | 1.83554200  |
| H  | -0.85498900 | -4.66772700 | 1.91420800  |
| H  | 0.03535500  | -3.32899900 | 2.69231300  |
| H  | 0.92802000  | -4.66368100 | 1.91044400  |
| H  | 0.92883300  | -4.89447700 | -1.25505600 |

**Table S31:** Coordinates of the optimized minimum in the  $T_1$  state of QT2 at the B3LYP/cc-pVDZ level.

|    |             |             |             |
|----|-------------|-------------|-------------|
| C  | -3.23271100 | -0.29686400 | 0.00338900  |
| S  | -1.85301600 | 0.82711200  | -0.03678600 |
| C  | -0.72394400 | -0.49364100 | 0.01186000  |
| C  | -2.75905800 | -1.61991000 | 0.05183600  |
| C  | 0.72404500  | -0.49348900 | 0.01315000  |
| S  | 1.85275300  | 0.82789700  | -0.03212700 |
| C  | 3.23202800  | -0.29579000 | 0.01090500  |
| C  | 2.75980800  | -1.61878700 | 0.05636500  |
| C  | 1.35555400  | -1.74322700 | 0.05826100  |
| C  | -4.57314700 | 0.17135000  | -0.01458300 |
| C  | 4.57317300  | 0.17245800  | -0.00260900 |
| C  | -5.78404900 | -0.65225100 | 0.01463600  |
| C  | -6.90306900 | 0.19787200  | -0.01741900 |
| C  | -6.44212000 | 1.56003200  | -0.06689000 |
| C  | -5.03591800 | 1.55385300  | -0.06553100 |
| C  | 5.05371095  | 1.51722887  | 0.29284221  |
| C  | 6.45486118  | 1.53306639  | 0.17208423  |
| C  | 6.89395893  | 0.21479789  | -0.20254780 |
| C  | 5.76615120  | -0.61695444 | -0.31374319 |
| C  | 6.12317077  | -1.94354098 | -0.71349252 |
| C  | 7.47579693  | -2.09425168 | -0.88475559 |
| S  | 8.36575562  | -0.61293630 | -0.57025735 |
| S  | 7.12970303  | 3.08445003  | 0.52104550  |
| C  | 5.52559273  | 3.73203923  | 0.83665392  |
| C  | 4.53694934  | 2.79531175  | 0.68033175  |
| S  | -8.39675800 | -0.67061200 | 0.01285500  |
| C  | -7.52923700 | -2.19654300 | 0.06939300  |
| C  | -6.16768000 | -2.02985500 | 0.06461100  |
| C  | -4.49696700 | 2.87981900  | -0.11362600 |
| C  | -5.47510700 | 3.83967000  | -0.14959100 |
| S  | -7.09565800 | 3.15792900  | -0.12598500 |
| Si | 0.00038300  | -3.07914100 | 0.10768600  |
| H  | 3.44214800  | -2.46458500 | 0.10858000  |
| H  | 5.42821599  | -2.76445488 | -0.88328726 |
| H  | 8.02013254  | -2.98792400 | -1.18088581 |
| H  | 5.42253306  | 4.77675753  | 1.12059693  |
| H  | 3.48576562  | 3.02942134  | 0.84290915  |
| H  | -8.09191100 | -3.12653800 | 0.10286100  |
| H  | -5.48714500 | -2.87918100 | 0.09635200  |
| H  | -3.43765700 | 3.13251800  | -0.12203600 |
| H  | -5.35515900 | 4.91981700  | -0.18910300 |
| C  | -1.35520500 | -1.74360800 | 0.05725600  |
| H  | -3.43988100 | -2.46763000 | 0.08206900  |
| C  | 0.00098400  | -4.20237900 | -1.41117600 |
| H  | 0.00146500  | -3.60924100 | -2.33901200 |
| H  | -0.89039200 | -4.85186200 | -1.41675900 |
| C  | -0.00004900 | -4.08622300 | 1.70590000  |
| H  | -0.89095900 | -4.73419600 | 1.75898400  |
| H  | -0.00088500 | -3.42552200 | 2.58690100  |
| H  | 0.89158800  | -4.73311000 | 1.75998800  |
| H  | 0.89209300  | -4.85223800 | -1.41591300 |
